# Supplementary material for: Exogenous sex steroid hormones and asthma in females: protocol for a population-based retrospective cohort study using a UK primary care database
Source: PubMed Central journal article supplement — BMJ Open. 2018 Jun 27;8(6):e020075. doi: 10.1136/bmjopen-2017-020075 (PMC6020980; doi:10.1136/bmjopen-2017-020075), 2018-06-27
Supplement: bmjopen-2017-020075.draft_revisions.pdf [file bmjopen-2017-020075.draft_revisions.pdf]

# BMJ Open

BMJ Open is committed to open peer review. As part of this commitment we make the peer review history of every article we publish publicly available.

When an article is published we post the peer reviewers' comments and the authors' responses online. We also post the versions of the paper that were used during peer review. These are the versions that the peer review comments apply to.

The versions of the paper that follow are the versions that were submitted during the peer review process. They are not the versions of record or the final published versions. They should not be cited or distributed as the published version of this manuscript.

BMJ Open is an open access journal and the full, final, typeset and author-corrected version of record of the manuscript is available on our site with no access controls, subscription charges or pay-per-view fees (<http://bmjopen.bmj.com>).

If you have any questions on BMJ Open's open peer review process please email [info.bmjopen@bmj.com](mailto:info.bmjopen@bmj.com)

# BMJ Open

## Exogenous sex steroid hormones and asthma in females: protocol for a population-based retrospective cohort study using primary care data

|                               |                                                                                                                                                                                                                                                                                                                                                                                                                                                                                                                                                                                                                                                                                                                                                                                                                                                                            |
|-------------------------------|----------------------------------------------------------------------------------------------------------------------------------------------------------------------------------------------------------------------------------------------------------------------------------------------------------------------------------------------------------------------------------------------------------------------------------------------------------------------------------------------------------------------------------------------------------------------------------------------------------------------------------------------------------------------------------------------------------------------------------------------------------------------------------------------------------------------------------------------------------------------------|
| Journal:                      | <i>BMJ Open</i>                                                                                                                                                                                                                                                                                                                                                                                                                                                                                                                                                                                                                                                                                                                                                                                                                                                            |
| Manuscript ID                 | bmjopen-2017-020075                                                                                                                                                                                                                                                                                                                                                                                                                                                                                                                                                                                                                                                                                                                                                                                                                                                        |
| Article Type:                 | Protocol                                                                                                                                                                                                                                                                                                                                                                                                                                                                                                                                                                                                                                                                                                                                                                                                                                                                   |
| Date Submitted by the Author: | 12-Oct-2017                                                                                                                                                                                                                                                                                                                                                                                                                                                                                                                                                                                                                                                                                                                                                                                                                                                                |
| Complete List of Authors:     | Nwaru, Bright; University of Gothenburg, Institute of Medicine, Krefting Research Centre<br>Simpson, Colin; The University of Edinburgh, Usher Institute of Population Health Sciences and Informatics<br>Soyiri, Ireneous; University of Edinburgh, Usher Institute of Population Health Sciences and Informatics<br>Pillinger, Rebecca; University of Edinburgh, Usher Institute of Population Health Sciences and Informatics<br>Appiagyei, Francis; Optimum Patient Care<br>Ryan, Dermot; University of Edinburgh, Allergy and Respiratory Research Group<br>Critchley, Hilary; University of Edinburgh, Obstetrics and Gynaecology<br>Price, David; Optimum Patient Care<br>Hawrylowicz, Catherine; King's College London, MRC and Asthma UK Centre for Allergic Mechanisms in Asthma<br>Sheikh, Aziz; University of Edinburgh, Division of Community Health Sciences |
| Keywords:                     | Asthma < THORACIC MEDICINE, females, hormonal contraception, hormone replacement therapy, oestrogen, progesterone                                                                                                                                                                                                                                                                                                                                                                                                                                                                                                                                                                                                                                                                                                                                                          |
|                               |                                                                                                                                                                                                                                                                                                                                                                                                                                                                                                                                                                                                                                                                                                                                                                                                                                                                            |

SCHOLARONE™  
Manuscripts

## Exogenous sex steroid hormones and asthma in females: protocol for a population-based retrospective cohort study using primary care data

Bright I Nwaru,<sup>1,2,3</sup> Colin R Simpson,<sup>3</sup> Ireneous N Soyiri,<sup>3</sup> Rebecca Pillinger,<sup>3</sup> Francis Appiagyei,<sup>4</sup> Dermot Ryan,<sup>3,4</sup> Hilary Critchley,<sup>5</sup> David Price,<sup>4,6,7</sup> Catherine M Hawrylowicz,<sup>8</sup> Aziz Sheikh<sup>3</sup>

<sup>1</sup>Krefting Research Centre, Institute of Medicine, University of Gothenburg, Sweden

<sup>2</sup>Wallenberg Centre for Molecular and Translational Medicine, Institute of Medicine, University of Gothenburg, Sweden

<sup>3</sup>Asthma UK Centre for Applied Research, Centre for Medical Informatics, The Usher Institute of Population Health Sciences and Informatics, The University of Edinburgh, Edinburgh, UK

<sup>4</sup>Optimum Patient Care, 5 Coles Lane, Cambridge, UK

<sup>5</sup>Medical Research Council Centre for Reproductive Health, Queen's Medical Research Institute, University of Edinburgh, UK

<sup>6</sup>Academic Primary Care, Division of Applied Health Sciences, University of Aberdeen

<sup>7</sup>Observational and Pragmatic Research Institute, Singapore

<sup>8</sup>MRC-Asthma UK Centre in Allergic Mechanisms of Asthma, Division of Asthma, Allergy and Lung Biology, Guys Hospital, Kings College London, UK

Correspondence to:

Bright Nwaru

Krefting Research Centre

Institute of Medicine

University of Gothenburg

SE-405 30 Gothenburg, Sweden

Email: [bright.nwaru@gu.se](mailto:bright.nwaru@gu.se)

### Keywords

asthma, females, hormonal contraception, hormone replacement therapy, oestrogen, progesterone, sex hormones.

**Running head: Exogenous sex hormones and asthma in females**

## ABSTRACT

**Introduction:** Female sex steroid hormones have been implicated in sex-related differences in the development and clinical outcomes of asthma. The role of exogenous sex steroids however remains unclear. Our recent systematic review highlighted the lack of high quality population-based studies investigating this subject. We aim to investigate whether the use of hormonal contraception and hormone replacement therapy (HRT), subtypes, and route of administration are associated with asthma onset and clinical outcomes in reproductive age and peri-menopausal/post-menopausal females.

**Methods and analysis:** Using the Optimum Patient Care Research Database (OPCRD), a national primary care database in the UK, we will construct a retrospective longitudinal cohort of reproductive age (16-45 years) and peri-menopausal/post-menopausal (46+ 70years) females. We will estimate the risk of new-onset asthma using Cox regression and multilevel modelling for repeated asthma outcomes, such as asthma attacks. We will adjust for confounding factors in all analyses. We will evaluate interactions between the use of exogenous sex hormones and body mass index and smoking by calculating the relative excess risk due to interaction and the attributable proportion due to interaction. With 90% power, we need 23,700 reproductive age females to detect a 20% reduction (risk ratio 0.8) in asthma attacks for use of any hormonal contraception and 6,000 peri-menopausal/post-menopausal females to detect a 40% (risk ratio 1.40) increased risk of asthma attacks for use of any HRT.

**Ethics and dissemination:** We have obtained approval (ADEPT1317) from the Anonymised Data Ethics and Protocol Transparency (ADEPT) Committee, which grants project-specific ethics approvals for the use of OPCRD data. Optimum Patient Care has an existing NHS Health Research Authority ethics approval for the use of OPCRD data for research (15/EM/150). We will present our findings at national and international scientific meetings and publish the results in international peer-reviewed journals.

**Protocol registration:** We will register the study protocol with the European Network of Centres for Pharmacoepidemiology and Pharmacovigilance (ENCePP) prior to starting the analyses.

### Strengths and limitations of this study

- The longitudinal nature of this study will fill an important gap in the evidence base as there is a paucity of longitudinal studies investigating the role of exogenous sex steroid hormones in asthma in females
- As a study based on primary care database, both exposure and outcome measures will be objectively defined
- This study is based on the general and unselected population; therefore, our findings will be generalizable to the general population of reproductive age and peri-menopausal/post-menopausal females
- Overall, this study will provide robust evidence that will inform potential causation and provide the direction for further mechanistic work
- A limitation of this work is that we will define reproductive and menopausal status of females based only on the ages of women, which is the only information from GP database for this purpose

## INTRODUCTION

Asthma is more common in boys than girls during early childhood.<sup>1-3</sup> However, after puberty, the prevalence and severity of asthma are higher in females than males.<sup>1-3</sup> Female sex steroid hormones are believed, at least in part, to explain these sex-related variations in asthma outcomes.<sup>1-3</sup> Variations in asthma incidence and clinical outcomes are seen to follow the hormonal transitional points in the female reproductive life course, in particular, puberty, menarche, menstruation, pregnancy and menopause.<sup>1,4</sup> Fluctuations in oestradiol and progesterone levels during the menstrual cycle have been linked to worsening of asthma symptoms in females,<sup>5</sup> although immunological mechanisms underlying these effects have not been defined.

Both oestrogen and progesterone influence smooth muscle functions, inflammation, and airway responsiveness.<sup>6,7,8</sup> Studies in animal models indicate that oestrogen increases T-helper (Th) 2 cell responses associated with allergic asthma.<sup>8</sup> A recent study showed that in patients with severe asthma, both oestrogen and progesterone were associated with a decrease in the expression of the left-7f microRNA as well as an increase in interleukin (IL)-23/IL-23 receptor signalling and IL-17A production, an effect that was more marked in women versus men.<sup>9</sup> Some evidence suggests that external suppression of endogenous sex steroid production through the use of exogenous hormonal contraception may improve asthma outcomes,<sup>10-14</sup> whereas the use of hormone replacement therapy (HRT) by menopausal women may increase the risk of new onset asthma and risk of poor clinical outcomes of asthma.<sup>15-20</sup> Females with asthma exhibit enhanced Th17 responses, reduced asthma symptoms, and improved lung function when using hormonal contraception.<sup>5,7,8,21,22</sup>

Using the serial cross-sectional Scottish Health Surveys, we recently observed substantial reductions in asthma exacerbations and hospital episodes in females using hormonal contraception compared to those not using hormonal contraception.<sup>13</sup> This work was followed by a comprehensive synthesis of the underlying evidence, which revealed inherent methodological limitations in previous studies on the topic, including a paucity of prospective longitudinal studies and limitations in the measurement of sex steroids and asthma outcomes.<sup>23</sup> To overcome these weaknesses and thus clarify whether the role of sex steroid hormones in asthma in females is causal, well-designed long-term longitudinal studies with well-characterised populations are required. We plan to investigate the role of exogenous sex steroid hormones in the development of asthma and manifestation of clinical and patient-reported outcomes in females by creating a retrospective longitudinal cohort of reproductive age and peri-menopausal/postmenopausal females using the Optimum Patient Care Research Database (OPCRD). Specifically, we aim to investigate the:

1. Associations between use of hormonal contraception and asthma onset, attacks, severity, mortality and health-related quality of life (HRQoL) in reproductive age females.
2. Impact of type of menopause (surgical vs non-surgical) and use of HRT on asthma onset, attacks, severity, mortality and HRQoL in peri-menopausal/post-menopausal females.
3. Interactions between exogenous sex hormones, body mass index (BMI), cigarette smoking and alcohol consumption in these associations.

## METHODS

### *Ethics approvals and permissions*

The main ethical issues relate to anonymity, confidentiality, data protection and the linkage of datasets. We have obtained approval (reference number: ADEPT1317) from the Anonymised Data Ethics and Protocol Transparency (ADEPT) Committee, which grants project-specific approvals for the use of the OPCRd data. Optimum Patient Care has an existing NHS Health Research Authority ethics approval for the use of OPCRd for research (REC Ref:

15/EM/150). All researchers involved in data analysis will have successfully completed the appropriate information governance courses.

### **Study design and population**

OPCRD is a bespoke longitudinal de-identified primary care database representing over 600 general practices across the UK and is regularly used to conduct epidemiological, clinical, and pharmaceutical research ([www. http://optimumpatientcare.org/opcrd/](http://optimumpatientcare.org/opcrd/)). A major advantage of the OPCRD database is the focus on respiratory outcomes; in up to 10% of patients with asthma, patient-reported questionnaire data on asthma outcomes are available. This provides the opportunity to study both clinical and patient-reported outcomes from the database. The study population for the present investigation will comprise all 16-70-year-old females in OPCRD. We will construct two independent cohorts to address the study objectives, namely:

1. Reproductive age females (16-45 years old) to study the associations between use of hormonal contraception and the study outcomes
2. Peri-menopausal (46-55 years old)/post-menopausal females (56+70 years old) to study the associations between type of menopause and HRT and the study outcomes.

### **Exposures**

We will ascertain the use of hormonal contraception and HRT and type of menopause by means of the Read Clinical Classification System (Read codes).<sup>24,25</sup> For the use of exogenous sex hormones, we will define the following exposures:

1. Reproductive age females: use of hormonal contraception, subtypes (oestrogen/progesterone combined, progesterone only), route of administration (oral, transdermal, subcutaneous, intramuscular, local intrauterine), and frequency and duration of use.
2. Peri-menopausal/post-menopausal females: use of HRT, subtypes (oestrogen/progesterone combined, oestrogen-only), route of administration (oral, transdermal, subcutaneous, local intrauterine), and frequency and duration of use.

### **Confounders**

Potential confounders will be extracted from the database using their respective Read codes, including age, parity, BMI, smoking, current use of asthma treatments and level of adherence to these, Index of Multiple Deprivation (IMD),<sup>26</sup> and co-morbidity based on the Charlson index.<sup>27</sup>

### **Outcomes**

The primary outcomes will include new-onset asthma, asthma attacks and severity. New-onset asthma will be defined as the first GP-recorded asthma event (including diagnosis, hospitalisation, medication prescription, or any other asthma event) occurring at least five years from the start of the follow-up date. We will exclude individuals with a relevant asthma event recorded up to five years after the start of follow-up date. We assume that within a 5-year period an asthma patient should have had at least one clinical encounter. Asthma attacks and severity will be defined based on the frequency of GP consultation, A&E attendance, oral steroid courses and hospital admissions for asthma. The outcomes will be determined using relevant Read codes. The secondary outcomes will include patient-reported asthma symptoms, medication use and HRQoL. Data on HRQoL will be assessed from patient-completed questionnaires on asthma symptoms and quality of life, which is an adjunct data collected from about 10% of patients and added to the OPCRD database.

### **Follow-up period**

We will follow the participants from baseline starting from 1 January 2000 or date of registration until 30 June 2017. With regards to onset of asthma, exit date from the cohort will

1  
2  
3 be defined as the date of first diagnosis of asthma (i.e. date of first record of an asthma  
4 encounter), death, deregistration from a practice, or end of follow-up (30 June 2017),  
5 whichever comes first.  
6  
7

### 8 **Statistical analyses**

9 Prior to the main analyses, the data will undergo relevant quality checks, including relevant  
10 variable categorisation (re-scaling where appropriate) and checks for missingness. We will  
11 undertake a complete case analysis and also perform multiple imputation for variables with  
12 missing values. We will perform 20 imputations in order to enhance the efficiency of the  
13 estimates and will use Rubin's rule to combine the estimates across the 20 datasets.<sup>28</sup>  
14 Where the specific time of onset of asthma is observable, we will perform survival analysis  
15 using the log-rank test to describe the survival functions of the groups as defined by use of  
16 sex hormones. We will use Cox proportional hazards regression to study the associations  
17 between exogenous sex hormones and the first record of an asthma event. Multilevel  
18 modelling will be used to estimate associations where the outcomes are repeated, e.g.  
19 number of asthma attacks and medication use. Since the change in hormone levels with  
20 contraceptive use is expected to differ between women, random coefficient models will be  
21 fitted, so that in turn the relationship between contraception use and asthma outcomes can  
22 differ between women. We will undertake analyses incorporating propensity scores using  
23 matching (exposed vs. unexposed).<sup>29</sup> The model will be non-parsimonious in order to include  
24 a wide range of factors that influence propensity to be prescribed hormonal contraceptives  
25 and HRT. To minimise potential biases, we will undertake different scenarios of sensitivity  
26 analyses in order to evaluate the robustness of our findings, including analyses for potential  
27 selection bias at baseline, unmeasured confounding and information bias.<sup>30</sup> These sets of  
28 bias analyses will be aided by deriving relevant internal data from a subset of the study  
29 population where possible. Alternatively, we will obtain external validation data (for instance,  
30 from the Secure Anonymised Information Linkage [SAIL] in Wales) that will provide the basis  
31 for defining the sensitivities of the different measures and allow appropriate adjustments to  
32 be made to our estimates. We will also evaluate the potential of confounding by indication  
33 bias by stratifying the analyses by the relevant disease indication for using sex steroid  
34 preparations. To estimate the potential interactions between sex hormones and BMI and  
35 cigarette smoking, we will calculate the relative excess risk due to interaction and the  
36 attributable proportion due to interaction.<sup>31</sup> All estimates will be accompanied by their  
37 respective 95% confidence intervals. Statistical analyses will be undertaken using R  
38 statistical software.  
39

### 40 **Sample size estimation**

41 Given estimates of our previous exploratory analysis using the Scottish Health Surveys (31%  
42 using any hormonal contraception, 6.5% with clinician-diagnosed asthma, and an odds ratio  
43 of 0.68, 95% confidence interval 0.47-0.98),<sup>13</sup> we determined that in order to have 90%  
44 power at an alpha level of 0.05 to detect up to 20% reduction (risk ratio 0.8) in asthma  
45 attacks, we will need a sample size of 23,700 reproductive age females for use of any  
46 hormonal contraception. Furthermore, with 90% power at an alpha level of 0.05, we  
47 determined that we will need 6,000 peri-menopausal/post-menopausal females to detect up  
48 to 40% (risk ratio 1.40) increased risk of asthma attack for use of any HRT.<sup>20</sup>  
49

### 50 **Reporting and dissemination plans**

51 We will report the findings of the study following the recommendations of STROBE  
52 (Strengthening the Reporting of Observational Studies in Epidemiology)<sup>32</sup> and RECORD  
53 (Reporting of studies Conducted using Observational Routinely-collected health Data).<sup>33</sup> All  
54 the analysis source codes will be made available at GitHub website at  
55 <https://github.com/asthmalhs>. The project findings will be presented at national and  
56 international scientific meetings and published in international journals. Furthermore, we will  
57 capitalise on the dissemination infrastructures of the Asthma UK Centre for Applied  
58  
59  
60

Research (e.g. the Twitter feed and dynamic website) and the University of Gothenburg to publicise our findings to clinicians, academics, patients, and reproductive health channels.

### Funding

This work was supported by Asthma UK, grant number: AUK-IG-2016-346. BN, INS, CRS, and AS were in addition support by the Farr Institute and Asthma UK Centre for Applied Research. BN acknowledges the support of Knut and Alice Wallenberg Foundation and the Wallenberg Centre for Molecular and Translational Medicine, University of Gothenburg, Sweden

### Conflict of interests

The authors declare no conflict of interest related to this work.

### Authors' contribution

BN and AS conceived the idea for this work. It was drafted by BN and was then revised after several rounds of critical comments from CRS, CMH, and AS and additional feedback from INS, RP, HC, FA, DR, and DP.

### REFERENCES

1. Baibergenova A, Thabane L, Akhtar-Danesh N, et al. Sex differences in hospital admissions from emergency departments in asthmatic adults: a population-based study. *Ann Allergy Asthma Immunol*. 2006; 96: 66-672.
2. Osman M, Hansell AL, Simpson CR, et al. Gender-specific presentations for asthma, allergic rhinitis and eczema in primary care. *Prim Care Respir J* 2007; 16: 28-35
3. Prescott E, Lange P, Vestbo J, et al. Effect of gender on hospital admissions for asthma and prevalence of self-reported asthma: a prospective study based on a sample of the general population. *Thorax* 1997; 52: 287-289.
4. Kynyk JA, Mastronarde JG, McCallister JW. Asthma, the sex difference. *Current Opinion in Pulmonary Medicine* 2011; 17: 6-11.
5. Agarwal SK, Marshall GD Jr. Perimenstrual alterations in type-1/type-2 cytokine balance of normal women. *Ann Allergy Asthma Immunol* 1999; 83: 222-8.
6. Haggerty CL, Ness RB, Kelsey S, et al. The impact of estrogen and progesterone on asthma. *Ann Allergy Asthma Immunol* 2003; 90: 284-91.
7. Verthelyi D. Female's heightened immune status: estrogen, T cells, and inducible nitric oxide synthase in the balance. *Endocrinology* 2006; 147:659-61.
8. Fuseini H, Newcomb DC. Mechanisms driving gender differences in asthma. *Curr Allergy Asthma Rep*. In press.
9. Newcomb DC, Cephus JY, Boswell MG, et al. Estrogen and progesterone decrease let-7f microRNA expression and increase IL-23/IL-23 receptor signaling and IL-17A production in patients with severe asthma. *J Allergy Clin Immunol* 2015; 136: 25-34.
10. Forbes L, Jarvis D, Burney P. Do hormonal contraceptives influence asthma severity? *European Respiratory Journal* 1999; 14: 1028-33.
11. Jenkins MA, Dharmage SC, Flander LB, et al. Parity and decreased use of oral contraceptives as predictors of asthma in young women. *Clinical and Experimental Allergy* 2006; 36: 609-13.
12. Lange P, Parner J, Prescott E, Ulrik CS, Vestbo J. Exogenous female sex steroid hormones and risk of asthma and asthma-like symptoms: a cross sectional study of the general population. *Thorax* 2001; 56: 613-6.
13. Nwaru BI, Sheikh A. Hormonal contraceptives and asthma in women of reproductive age: analysis of data from serial national Scottish Health Surveys. *Journal of the Royal Society of Medicine* 2015; 108: 358-71.
14. Salam MT, Wenten M, Gilliland FD. Endogenous and exogenous sex steroid hormones and asthma and wheeze in young women. *Journal of Allergy and Clinical Immunology* 2006; 117(5): 1001-7.



15. Barr RG, Wentowski CC, Grodstein F, et al. Prospective study of postmenopausal hormone use and newly diagnosed asthma and chronic obstructive pulmonary disease. *Archives of Internal Medicine* 2004; 164: 379-86.
16. Gomez Real F, Svanes C, Bjornsson EH, et al. Hormone replacement therapy, body mass index and asthma in perimenopausal women: A cross sectional survey. *Thorax* 2006; 61: 34-40.
17. Jarvis D, Leynaert B. The association of asthma, atopy and lung function with hormone replacement therapy and surgical cessation of menstruation in a population-based sample of English women. *Allergy* 2008; 63: 95-102.
18. Romieu I, Fabre A, Fournier A, et al. Postmenopausal hormone therapy and asthma onset in the E3N cohort. *Thorax* 2010; 65: 292-297.
19. Tattersfield AE. Is postmenopausal HRT a risk factor for adult-onset asthma? *Thorax* 2010; 65: 282-
20. Troisi RJ, Speizer FE, Willett WC, Trichopoulos D, Rosner B. Menopause, postmenopausal estrogen preparations, and the risk of adult-onset asthma: A prospective cohort study. *American Journal of Respiratory and Critical Care Medicine* 1995; 152: 1183-1188.
21. Chandler MH, Schuldheisz S, Phillips BA, et al. Premenstrual asthma: the effect of estrogen on symptoms, pulmonary function, and beta 2-receptors. *Pharmacotherapy* 1997; 17: 224-234.
22. Matsuo N, Shimoda T, Matsuse H, et al. A case of menstruation-associated asthma: treatment with oral contraceptives. *Chest* 1999; 116: 252-253.
23. Nwaru BI, Nurmatov U, Sheikh A. Endogenous and exogenous sex steroid hormones in asthma and allergy in females: protocol for a systematic review and meta-analysis. *NPJ Prim Care Respir Med* 2016; 26: 15078.
24. Williams T, van Staa T, Puri S, Eaton S. Recent advances and use of the General Practice Research Database as an example of a UK Primary Care Data resource. *Ther Adv Drug Saf* 2012; 3: 89-99.
25. Quint JK, Müllerova H, DiSantostefano RL, Forbes H, et al. Validation of chronic obstructive pulmonary disease recording in the Clinical Practice Research Datalink (CPRD-GOLD). *BMJ Open* 2014; 4: e005540.
26. Eisner MD, Katz PP, Yelin EH, et al. Risk factors for hospitalization among adults with asthma: the influence of sociodemographic factors and asthma severity. *Respir Res* 2001; 2: 53-60.
27. Charlson ME, Pompei P, Ales KL, MacKenzie CR. A new method of classifying prognostic comorbidity in longitudinal studies: development and validation. *J Chron Dis* 1987; 40: 373-383.
28. Rubin DB. Multiple imputation for non-response in surveys. John Wiley, 1987.
29. Austin PC. An introduction to propensity score methods for reducing the effects of confounding in observational studies. *Multivariate Behav Res* 2011; 46: 399-424.
30. Lash TL, Fox MP, Fink AK. Applying quantitative bias analysis to epidemiologic data. Springer, New York, 2009.
31. Andersson T, Alfredsson L, Källberg H, et al. Calculating measures of biological interaction. *Eru J Epidemiol* 2005; 20: 575-579.
32. von Elm E, Altman DG, Egger M, et al. Strengthening the Reporting of Observational Studies in Epidemiology (STROBE) statement: guidelines for reporting observational studies. *BMJ* 2007; 335: 806-808.
33. Bemnchamol EI, Smeeth L, Guttman A, et al. The Reporting of studies Conducted using Observational Routinely-collected health Data (RECORD) statement. *Plos Med* 2015; 12: e1001885.

# BMJ Open

## Exogenous sex steroid hormones and asthma in females: protocol for a population-based retrospective cohort study using primary care data

|                                 |                                                                                                                                                                                                                                                                                                                                                                                                                                                                                                                                                                                                                                                                                                                                                                                                                                                                            |
|---------------------------------|----------------------------------------------------------------------------------------------------------------------------------------------------------------------------------------------------------------------------------------------------------------------------------------------------------------------------------------------------------------------------------------------------------------------------------------------------------------------------------------------------------------------------------------------------------------------------------------------------------------------------------------------------------------------------------------------------------------------------------------------------------------------------------------------------------------------------------------------------------------------------|
| Journal:                        | <i>BMJ Open</i>                                                                                                                                                                                                                                                                                                                                                                                                                                                                                                                                                                                                                                                                                                                                                                                                                                                            |
| Manuscript ID                   | bmjopen-2017-020075.R1                                                                                                                                                                                                                                                                                                                                                                                                                                                                                                                                                                                                                                                                                                                                                                                                                                                     |
| Article Type:                   | Protocol                                                                                                                                                                                                                                                                                                                                                                                                                                                                                                                                                                                                                                                                                                                                                                                                                                                                   |
| Date Submitted by the Author:   | 13-Mar-2018                                                                                                                                                                                                                                                                                                                                                                                                                                                                                                                                                                                                                                                                                                                                                                                                                                                                |
| Complete List of Authors:       | Nwaru, Bright; University of Gothenburg, Institute of Medicine, Krefting Research Centre<br>Simpson, Colin; The University of Edinburgh, Usher Institute of Population Health Sciences and Informatics<br>Soyiri, Ireneous; University of Edinburgh, Usher Institute of Population Health Sciences and Informatics<br>Pillinger, Rebecca; University of Edinburgh, Usher Institute of Population Health Sciences and Informatics<br>Appiagyei, Francis; Optimum Patient Care<br>Ryan, Dermot; University of Edinburgh, Allergy and Respiratory Research Group<br>Critchley, Hilary; University of Edinburgh, Obstetrics and Gynaecology<br>Price, David; Optimum Patient Care<br>Hawrylowicz, Catherine; King's College London, MRC and Asthma UK Centre for Allergic Mechanisms in Asthma<br>Sheikh, Aziz; University of Edinburgh, Division of Community Health Sciences |
| <b>Primary Subject Heading</b>: | Epidemiology                                                                                                                                                                                                                                                                                                                                                                                                                                                                                                                                                                                                                                                                                                                                                                                                                                                               |
| Secondary Subject Heading:      | Respiratory medicine                                                                                                                                                                                                                                                                                                                                                                                                                                                                                                                                                                                                                                                                                                                                                                                                                                                       |
| Keywords:                       | Asthma < THORACIC MEDICINE, females, hormonal contraception, hormone replacement therapy, oestrogen, progesterone                                                                                                                                                                                                                                                                                                                                                                                                                                                                                                                                                                                                                                                                                                                                                          |
|                                 |                                                                                                                                                                                                                                                                                                                                                                                                                                                                                                                                                                                                                                                                                                                                                                                                                                                                            |

SCHOLARONE™  
Manuscripts

1  
2  
3 **Exogenous sex steroid hormones and asthma in females: protocol for a population-**  
4 **based retrospective cohort study using primary care data**

5  
6 Bright I Nwaru,<sup>1,2,3</sup> Colin R Simpson,<sup>3</sup> Ireneous N Soyiri,<sup>3</sup> Rebecca Pillinger,<sup>3</sup> Francis  
7 Appiagyei,<sup>4</sup> Dermot Ryan,<sup>3,4</sup> Hilary Critchley,<sup>5</sup> David Price,<sup>4,6,7</sup> Catherine M Hawrylowicz,<sup>8</sup>  
8 Aziz Sheikh<sup>3</sup>

9  
10 <sup>1</sup>Krefting Research Centre, Institute of Medicine, University of Gothenburg, Sweden

11 <sup>2</sup>Wallenberg Centre for Molecular and Translational Medicine, Institute of Medicine,  
12 University of Gothenburg, Sweden

13 <sup>3</sup>Asthma UK Centre for Applied Research, Centre for Medical Informatics, The Usher Institute  
14 of Population Health Sciences and Informatics, The University of Edinburgh, Edinburgh, UK

15 <sup>4</sup>Optimum Patient Care, 5 Coles Lane, Cambridge, UK

16 <sup>5</sup>Medical Research Council Centre for Reproductive Health, Queen's Medical Research  
17 Institute, University of Edinburgh, UK

18 <sup>6</sup>Academic Primary Care, Division of Applied Health Sciences, University of Aberdeen

19 <sup>7</sup>Observational and Pragmatic Research Institute, Singapore

20 <sup>8</sup>MRC-Asthma UK Centre in Allergic Mechanisms of Asthma, Division of Asthma, Allergy and  
21 Lung Biology, Guys Hospital, Kings College London, UK

22  
23 Correspondence to:

24 Bright Nwaru

25 Krefting Research Centre

26 Institute of Medicine

27 University of Gothenburg

28 SE-405 30 Gothenburg, Sweden

29  
30 Email: [bright.nwaru@gu.se](mailto:bright.nwaru@gu.se)

31 **Keywords**

32 asthma, females, hormonal contraception, hormone replacement therapy, oestrogen,  
33 progesterone, sex hormones.  
34  
35

36 **Running head: Exogenous sex hormones and asthma in females**  
37  
38  
39  
40  
41  
42  
43  
44  
45  
46  
47  
48  
49  
50  
51  
52  
53  
54  
55  
56  
57  
58  
59  
60

## ABSTRACT

**Introduction:** Female sex steroid hormones have been implicated in sex-related differences in the development and clinical outcomes of asthma. The role of exogenous sex steroids however remains unclear. Our recent systematic review highlighted the lack of high quality population-based studies investigating this subject. We aim to investigate whether the use of hormonal contraception and hormone replacement therapy (HRT), subtypes, and route of administration are associated with asthma onset and clinical outcomes in reproductive age and peri-menopausal/post-menopausal females.

**Methods and analysis:** Using the Optimum Patient Care Research Database (OPCRD), a national primary care database in the UK, we will construct a retrospective longitudinal cohort of reproductive age (16-45 years) and peri-menopausal/post-menopausal (46-70years) females. We will estimate the risk of new-onset asthma using Cox regression and multilevel modelling for repeated asthma outcomes, such as asthma attacks. We will adjust for confounding factors in all analyses. We will evaluate interactions between the use of exogenous sex hormones and body mass index and smoking by calculating the relative excess risk due to interaction and the attributable proportion due to interaction. With 90% power, we need 23,700 reproductive age females to detect a 20% reduction (risk ratio 0.8) in asthma attacks for use of any hormonal contraception and 6,000 peri-menopausal/post-menopausal females to detect a 40% (risk ratio 1.40) increased risk of asthma attacks for use of any HRT.

**Ethics and dissemination:** We have obtained approval (ADEPT1317) from the Anonymised Data Ethics and Protocol Transparency (ADEPT) Committee, which grants project-specific ethics approvals for the use of OPCRD data. Optimum Patient Care has an existing NHS Health Research Authority ethics approval for the use of OPCRD data for research (15/EM/150). We will present our findings at national and international scientific meetings and publish the results in international peer-reviewed journals.

**Protocol registration:** The study protocol is registered with the European Union electronic Register of Post-Authorisation Studies (EUPAS22967).

### Strengths and limitations of this study

- The longitudinal nature of this study will fill an important gap in the evidence base as there is a paucity of longitudinal studies investigating the role of exogenous sex steroid hormones in asthma in females
- As a study based on primary care database, both exposure and outcome measures will be objectively defined
- This study is based on the general and unselected population; therefore, our findings will be generalizable to the general population of reproductive age and peri-menopausal/post-menopausal females
- Overall, this study will provide robust evidence that will inform potential causation and provide the direction for further mechanistic work
- A limitation of this work is that we will define reproductive and menopausal status of females based only on the ages of women, which is the only information from GP database for this purpose

## INTRODUCTION

Asthma is more common in boys than girls during early childhood.<sup>1-3</sup> However, after puberty, the prevalence and severity of asthma are higher in females than males.<sup>1-3</sup> Female sex steroid hormones are believed, at least in part, to explain these sex-related variations in asthma outcomes.<sup>1-3</sup> Variations in asthma incidence and clinical outcomes are seen to follow the hormonal transitional points in the female reproductive life course, in particular, puberty, menarche, menstruation, pregnancy and menopause.<sup>1,4</sup> Fluctuations in oestradiol and progesterone levels during the menstrual cycle have been linked to worsening of asthma symptoms in females,<sup>5</sup> although immunological mechanisms underlying these effects have not been defined. In comparison to non-menopausal females, transitional menopausal females and both early and late post-menopausal females were at increased risk of new-onset asthma. In primary studies, the role of menopause on risk of current symptoms of asthma were equivocal,<sup>6</sup> but a recent meta-analysis of these studies showed a moderately increased risk.<sup>7</sup>

Both oestrogen and progesterone influence smooth muscle functions, inflammation, and airway responsiveness.<sup>8-10</sup> Studies in animal models indicate that oestrogen increases T-helper (Th) 2 cell responses associated with allergic asthma.<sup>10</sup> A recent study showed that in patients with severe asthma, both oestrogen and progesterone were associated with a decrease in the expression of the left-7f microRNA as well as an increase in interleukin (IL)-23/IL-23 receptor signalling and IL-17A production, an effect that was more marked in women versus men.<sup>11</sup> Some evidence suggests that external suppression of endogenous sex steroid production through the use of exogenous hormonal contraception may improve asthma outcomes,<sup>12-17</sup> whereas the use of hormone replacement therapy (HRT) by menopausal women may increase the risk of new onset asthma and risk of poor clinical outcomes of asthma.<sup>18-23</sup> Females with asthma exhibit enhanced Th17 responses, reduced asthma symptoms, and improved lung function when using hormonal contraception.<sup>5,9,10,24,25</sup>

The role of use of hormonal contraceptives both in the development of new-onset asthma<sup>23,26</sup> and manifestation of current symptoms of asthma<sup>16</sup> has been conflicting. Using the serial cross-sectional Scottish Health Surveys, we recently observed substantial reductions in asthma exacerbations and hospital episodes in females using hormonal contraception compared to those not using hormonal contraception.<sup>15</sup> This work was followed by a comprehensive synthesis of the underlying evidence, which revealed inherent methodological limitations in previous studies on the topic, including a paucity of prospective longitudinal studies and limitations in the measurement of sex steroids and asthma outcomes.<sup>7</sup> To overcome these weaknesses and thus clarify whether the role of sex steroid hormones in asthma in females is causal, well-designed long-term longitudinal studies with well-characterised populations are required. We plan to investigate the role of exogenous sex steroid hormones in the development of asthma and manifestation of clinical and patient-reported outcomes in females by creating a retrospective longitudinal cohort of reproductive age and peri-menopausal/postmenopausal females using the Optimum Patient Care Research Database (OPCRD). Specifically, we aim to investigate the:

1. Associations between use of hormonal contraception and asthma onset, attacks, severity, mortality and health-related quality of life (HRQoL) in reproductive age females.
2. Impact of type of menopause (surgical vs non-surgical) and use of HRT on asthma onset, attacks, severity, mortality and HRQoL in peri-menopausal/post-menopausal females.
3. Interactions between exogenous sex hormones, body mass index (BMI), cigarette smoking and alcohol consumption in these associations.

## METHODS

### *Ethics approvals and permissions*

1  
2  
3 The main ethical issues relate to anonymity, confidentiality, data protection and the linkage of  
4 datasets. We have obtained approval (reference number: ADEPT1317) from the Anonymised  
5 Data Ethics and Protocol Transparency (ADEPT) Committee, which grants project-specific  
6 approvals for the use of the OPCRd data. Optimum Patient Care has an existing NHS Health  
7 Research Authority ethics approval for the use of OPCRd for research (REC Ref:  
8 15/EM/150). All researchers involved in data analysis will have successfully completed the  
9 appropriate information governance courses.

### 10 **Study design and population**

11 OPCRd is a bespoke longitudinal de-identified primary care database representing over 600  
12 general practices across the UK and is regularly used to conduct epidemiological, clinical,  
13 and pharmaceutical research ([www. http://optimumpatientcare.org/opcrd/](http://optimumpatientcare.org/opcrd/)). A major  
14 advantage of the OPCRd database is the focus on respiratory outcomes; in up to 10% of  
15 patients with asthma, patient-reported questionnaire data on asthma outcomes are available.  
16 This provides the opportunity to study both clinical and patient-reported outcomes from the  
17 database. The study population for the present investigation will comprise all 16-70-year-old  
18 females in OPCRd. We will construct two independent cohorts to address the study  
19 objectives, namely:

- 21 1. Reproductive age females (16-45 years old) to study the associations between use of  
22 hormonal contraception and the study outcomes
- 23 2. Peri-menopausal (46-55 years old)/post-menopausal females (56-70 years old) to  
24 study the associations between type of menopause and HRT and the study  
25 outcomes.

### 27 **Exposures**

28 We will ascertain the use of hormonal contraception and HRT and type of menopause by  
29 means of the Read Clinical Classification System (Read codes).<sup>27,28</sup> We will define the  
30 following exposures:

- 31 1. Reproductive age females: use of hormonal contraception versus non-use of  
32 hormonal contraception; subtypes (oestrogen/progestogen combined, progestogen  
33 only versus non-use of hormonal contraception); route of administration (transdermal,  
34 subcutaneous, intramuscular, local intrauterine versus oral route), and frequency and  
35 duration of use (as a count exposure).
- 36 2. Menopausal status: peri-menopausal (46-55 years) versus non-menopausal (<46  
37 years); post-menopausal (56-70 years) versus non-menopausal (<46 years)
- 38 3. Peri-menopausal/post-menopausal females: use of HRT versus non-HRT use,  
39 subtypes (oestrogen/ progestogen combined, oestrogen-only versus non-HRT use),  
40 route of administration (transdermal, subcutaneous, local intrauterine versus oral  
41 route), and frequency and duration of use (as a count exposure).

### 43 **Confounders**

44 Potential confounders will be extracted from the database using their respective Read codes,  
45 including age, parity, BMI, smoking, current use of asthma treatments and level of adherence  
46 to these using our definition based on the algorithm developed within the OPCRd<sup>29</sup>, Index of  
47 Multiple Deprivation (IMD),<sup>30</sup> co-morbidity based on the Charlson index,<sup>31</sup> and other  
48 indications for use of hormonal contraception (e.g. endometriosis, polycystic ovary syndrome  
49 (PCOS), menorrhagia, acne, and metrorrhagia) and HRT (e.g. onset of menopause,  
50 endometriosis, and indicators for hysterectomy for symptomatic uterine fibroids, and heavy  
51 menstrual bleeding) besides contraception and symptoms of menopausal transition,  
52 respectively. Endometriosis<sup>32</sup> and PCOS,<sup>33</sup> key indicators for the use of hormonal  
53 contraceptives among reproductive age women, have been linked to risk of asthma;  
54 therefore are important confounders in the association between use of hormonal  
55 contraceptives and asthma. For HRT, the onset of menopause itself and hysterectomy, other  
56  
57  
58  
59

1  
2  
3 indicators for use of HRT besides symptoms of menopausal transition, have also been linked  
4 to asthma.<sup>6,21</sup>  
5

### 6 **Outcomes**

7 The primary outcomes will include new-onset asthma, asthma attacks and severity. New-  
8 onset asthma will be defined as the first GP-recorded asthma event (including diagnosis,  
9 hospitalisation, medication prescription, or any other asthma event) occurring at least five  
10 years from the start of the follow-up date. We will exclude individuals with a relevant asthma  
11 event recorded up to five years after the start of follow-up date. We assume that within a 5-  
12 year period an asthma patient should have had at least one clinical encounter. Asthma  
13 attacks and severity will be defined based on the frequency of GP consultation, A&E  
14 attendance, oral steroid courses and hospital admissions for asthma. Using these  
15 parameters and based on algorithm we have now developed within the OPCRD database,  
16 patients will be classified according to the British Thoracic Society (BTS) and Scottish  
17 Intercollegiate Guidelines Network (SIGN) asthma severity steps.<sup>34</sup> The outcomes will be  
18 determined using relevant Read codes. The secondary outcomes will include patient-  
19 reported asthma symptoms, medication use and HRQoL. Data on HRQoL will be assessed  
20 from patient-completed questionnaires on asthma symptoms and quality of life, which is an  
21 adjunct data collected from about 10% of patients and added to the OPCRD database.  
22

### 23 **Follow-up period**

24 We will follow the participants from baseline starting from 1 January 2000 or date of  
25 registration until 30 June 2017. With regards to onset of asthma, exit date from the cohort will  
26 be defined as the date of first diagnosis of asthma (i.e. date of first record of an asthma  
27 encounter), death, deregistration from a practice, or end of follow-up (30 June 2017),  
28 whichever comes first.  
29

### 30 **Statistical analyses**

31 Prior to the main analyses, the data will undergo relevant quality checks, including relevant  
32 variable categorisation (re-scaling where appropriate) and checks for missingness. We will  
33 undertake a complete case analysis and also perform multiple imputation for variables with  
34 missing values. We will perform 20 imputations in order to enhance the efficiency of the  
35 estimates and will use Rubin's rule to combine the estimates across the 20 datasets.<sup>35</sup>  
36 Where the specific time of onset of asthma is observable, we will perform survival analysis  
37 using the log-rank test to describe the survival functions of the groups as defined by use of  
38 sex hormones. We will use Cox proportional hazards regression to study the associations  
39 between exogenous sex hormones and the first record of an asthma event. Multilevel  
40 modelling will be used to estimate associations where the outcomes are repeated, e.g.  
41 number of asthma attacks and medication use. Since the change in hormone levels with  
42 contraceptive use is expected to differ between women, random coefficient models will be  
43 fitted, so that in turn the relationship between contraception use and asthma outcomes can  
44 differ between women. We will undertake analyses incorporating propensity scores using  
45 matching (exposed vs. unexposed).<sup>36</sup> The model will be non-parsimonious in order to include  
46 a wide range of factors that influence propensity to be prescribed hormonal contraceptives  
47 and HRT. To minimise potential biases, we will undertake different scenarios of sensitivity  
48 analyses in order to evaluate the robustness of our findings, including analyses for potential  
49 selection bias at baseline, unmeasured confounding and information bias.<sup>37</sup> These sets of  
50 bias analyses will be aided by deriving relevant internal data from a subset of the study  
51 population where possible. Alternatively, we will obtain external validation data (for instance,  
52 from the Secure Anonymised Information Linkage [SAIL] in Wales) that will provide the basis  
53 for defining the sensitivities of the different measures and allow appropriate adjustments to  
54 be made to our estimates. We will also evaluate the potential of confounding by indication  
55 bias by stratifying the analyses by the relevant disease indication for using sex steroid  
56 preparations as indicated above in the section on confounding. To estimate the potential  
57  
58  
59

1  
2  
3 interactions between sex hormones and BMI and cigarette smoking, we will calculate the  
4 relative excess risk due to interaction and the attributable proportion due to interaction.<sup>38</sup> All  
5 estimates will be accompanied by their respective 95% confidence intervals. Statistical  
6 analyses will be undertaken using R statistical software.  
7  
8  
9

### 10 **Sample size estimation**

11 Given estimates of our previous exploratory analysis using the Scottish Health Surveys (31%  
12 using any hormonal contraception, 6.5% with clinician-diagnosed asthma, and an odds ratio  
13 of 0.68, 95% confidence interval 0.47-0.98),<sup>15</sup> we determined that in order to have 90%  
14 power at an alpha level of 0.05 to detect up to 20% reduction (risk ratio 0.8) in asthma  
15 attacks, we will need a sample size of 23,700 reproductive age females for use of any  
16 hormonal contraception. Furthermore, with 90% power at an alpha level of 0.05, we  
17 determined that we will need 6,000 peri-menopausal/post-menopausal females to detect up  
18 to 40% (risk ratio 1.40) increased risk of asthma attack for use of any HRT.<sup>23</sup> Currently, the  
19 OPCR database has over 5 million population of patients; we anticipate that about five  
20 hundred thousand patients will meet the criteria for inclusion into this study.  
21

### 22 **Reporting and dissemination plans**

23 We will report the findings of the study following the recommendations of STROBE  
24 (Strengthening the Reporting of Observational Studies in Epidemiology)<sup>39</sup> and RECORD  
25 (Reporting of studies Conducted using Observational Routinely-collected health Data).<sup>40</sup> All  
26 the analysis source codes will be made available at GitHub website at  
27 <https://github.com/asthmalhs>. The project findings will be presented at national and  
28 international scientific meetings and published in international journals. Furthermore, we will  
29 capitalise on the dissemination infrastructures of the Asthma UK Centre for Applied  
30 Research (e.g. the Twitter feed and dynamic website) and the University of Gothenburg to  
31 publicise our findings to clinicians, academics, patients, and reproductive health channels.  
32

### 33 **Funding**

34 This work was supported by Asthma UK, grant number: AUK-IG-2016-346. BN, INS, CRS,  
35 and AS were in addition support by the Farr Institute and Asthma UK Centre for Applied  
36 Research. BN acknowledges the support of Knut and Alice Wallenberg Foundation and the  
37 Wallenberg Centre for Molecular and Translational Medicine, University of Gothenburg,  
38 Sweden  
39

### 40 **Conflict of interests**

41 The authors declare no conflict of interest related to this work.  
42

### 43 **Authors' contribution**

44 BN and AS conceived the idea for this work. It was drafted by BN and was then revised after  
45 several rounds of critical comments from CRS, CMH, and AS and additional feedback from  
46 INS, RP, HC, FA, DR, and DP.  
47

### 48 **REFERENCES**

- 49 1. Baibergenova A, Thabane L, Akhtar-Danesh N, et al. Sex differences in hospital  
50 admissions from emergency departments in asthmatic adults: a population-based  
51 study. *Ann Allergy Asthma Immunol*. 2006; 96: 66-672.
- 52 2. Osman M, Hansell AL, Simpson CR, et al. Gender-specific presentations for asthma,  
53 allergic rhinitis and eczema in primary care. *Prim Care Respir J* 2007; 16: 28-35
- 54 3. Prescott E, Lange P, Vestbo J, et al. Effect of gender on hospital admissions for  
55 asthma and prevalence of self-reported asthma: a prospective study based on a  
56 sample of the general population. *Thorax* 1997; 52: 287-289.  
57



- 1
  - 2
  - 3
  - 4
  - 5
  - 6
  - 7
  - 8
  - 9
  - 10
  - 11
  - 12
  - 13
  - 14
  - 15
  - 16
  - 17
  - 18
  - 19
  - 20
  - 21
  - 22
  - 23
  - 24
  - 25
  - 26
  - 27
  - 28
  - 29
  - 30
  - 31
  - 32
  - 33
  - 34
  - 35
  - 36
  - 37
  - 38
  - 39
  - 40
  - 41
  - 42
  - 43
  - 44
  - 45
  - 46
  - 47
  - 48
  - 49
  - 50
  - 51
  - 52
  - 53
  - 54
  - 55
  - 56
  - 57
  - 58
  - 59
  - 60
4. Kynnyk JA, Mastronarde JG, McCallister JW. Asthma, the sex difference. *Current Opinion in Pulmonary Medicine* 2011; 17: 6-11.
  5. Bonds RS, Midoro-Horiuti T. Estrogen effects in allergy and asthma. *Curr Opin Allergy Clin Immunol* 2013; 13: 92-99.
  6. Triebner K, Johannessen A, Puggini L, Benediktsdottir B, Bertelsen RJ, Bifulco E, et al. Menopause as a precursor of new-onset asthma: a longitudinal Northern European population study. *J Allergy Clin Immunol* 2016; 137: 50-57.
  7. McCleary N, Nwaru BI, Nurmatov UB, Critchley H, Sheikh A. Endogenous and exogenous sex steroid hormones in asthma and allergy in females: a systematic review and meta-analysis. *J Allergy Clin Immunol*. In press
  8. Haggerty CL, Ness RB, Kelsey S, et al. The impact of estrogen and progesterone on asthma. *Ann Allergy Asthma Immunol* 2003; 90: 284-91.
  9. Verthelyi D. Female's heightened immune status: estrogen, T cells, and inducible nitric oxide synthase in the balance. *Endocrinology* 2006; 147:659-61.
  10. Fuseini H, Newcomb DC. Mechanisms driving gender differences in asthma. *Curr Allergy Asthma Rep*. In press.
  11. Newcomb DC, Cephus JY, Boswell MG, et al. Estrogen and progesterone decrease let-7f microRNA expression and increase IL-23/IL-23 receptor signaling and IL-17A production in patients with severe asthma. *J Allergy Clin Immunol* 2015; 136: 25-34.
  12. Forbes L, Jarvis D, Burney P. Do hormonal contraceptives influence asthma severity? *European Respiratory Journal* 1999; 14: 1028-33.
  13. Jenkins MA, Dharmage SC, Flander LB, et al. Parity and decreased use of oral contraceptives as predictors of asthma in young women. *Clinical and Experimental Allergy* 2006; 36: 609-13.
  14. Lange P, Parner J, Prescott E, Ulrik CS, Vestbo J. Exogenous female sex steroid hormones and risk of asthma and asthma-like symptoms: a cross sectional study of the general population. *Thorax* 2001; 56: 613-6.
  15. Nwaru BI, Sheikh A. Hormonal contraceptives and asthma in women of reproductive age: analysis of data from serial national Scottish Health Surveys. *Journal of the Royal Society of Medicine* 2015; 108: 358-71.
  16. Scott HA, Gibson PG, Garg ML, Upham JW, Wood LG. Sex hormones and systemic inflammation are modulators of the obese-asthma phenotype. *Allergy*. 2016; 71: 1037-1047.
  17. Salam MT, Wenten M, Gilliland FD. Endogenous and exogenous sex steroid hormones and asthma and wheeze in young women. *Journal of Allergy and Clinical Immunology* 2006; 117(5): 1001-7.
  18. Barr RG, Wentowski CC, Grodstein F, et al. Prospective study of postmenopausal hormone use and newly diagnosed asthma and chronic obstructive pulmonary disease. *Archives of Internal Medicine* 2004; 164: 379-86.
  19. Gomez Real F, Svanes C, Bjornsson EH, et al. Hormone replacement therapy, body mass index and asthma in perimenopausal women: A cross sectional survey. *Thorax* 2006; 61: 34-40.
  20. Jarvis D, Leynaert B. The association of asthma, atopy and lung function with hormone replacement therapy and surgical cessation of menstruation in a population-based sample of English women. *Allergy* 2008; 63: 95-102.
  21. Romieu I, Fabre A, Fournier A, et al. Postmenopausal hormone therapy and asthma onset in the E3N cohort. *Thorax* 2010; 65: 292-297.
  22. Tattersfield AE. Is postmenopausal HRT a risk factor for adult-onset asthma? *Thorax* 2010; 65: 282-
  23. Troisi RJ, Speizer FE, Willett WC, Trichopoulos D, Rosner B. Menopause, postmenopausal estrogen preparations, and the risk of adult-onset asthma: A prospective cohort study. *American Journal of Respiratory and Critical Care Medicine* 1995; 152: 1183-1188.

- 1
  - 2
  - 3
  - 4
  - 5
  - 6
  - 7
  - 8
  - 9
  - 10
  - 11
  - 12
  - 13
  - 14
  - 15
  - 16
  - 17
  - 18
  - 19
  - 20
  - 21
  - 22
  - 23
  - 24
  - 25
  - 26
  - 27
  - 28
  - 29
  - 30
  - 31
  - 32
  - 33
  - 34
  - 35
  - 36
  - 37
  - 38
  - 39
  - 40
  - 41
  - 42
  - 43
  - 44
  - 45
  - 46
  - 47
  - 48
  - 49
  - 50
  - 51
  - 52
  - 53
  - 54
  - 55
  - 56
  - 57
  - 58
  - 59
  - 60
24. Chandler MH, Schuldheisz S, Phillips BA, et al. Premenstrual asthma: the effect of estrogen on symptoms, pulmonary function, and beta 2-receptors. *Pharmacotherapy* 1997; 17: 224-234.
25. Matsuo N, Shimoda T, Matsuse H, et al. A case of menstruation-associated asthma: treatment with oral contraceptives. *Chest* 1999; 116: 252-253.
26. Wie J, Gerlich J, Genuet J, Nowak D, Vogelberg C, von Mutius E, et al. Hormonal factors and incident asthma and allergic rhinitis during puberty in girls. *Ann Allergy Asthma Immunol* 2015; 115: 21-27.
27. Williams T, van Staa T, Puri S, Eaton S. Recent advances and use of the General Practice Research Database as an example of a UK Primary Care Data resource. *Ther Adv Drug Saf* 2012; 3: 89-99.
28. Quint JK, Müllerova H, DiSantostefano RL, Forbes H, et al. Validation of chronic obstructive pulmonary disease recording in the Clinical Practice Research Datalink (CPRD-GOLD). *BMJ Open* 2014; 4: e005540.
29. Souverein PC, Koster ES, Colice G, van Ganse E, Chisholm A, Price D, et al. Inhaled corticosteroid adherence patterns in a longitudinal asthma cohort. *J Allergy Clin Immunol Pract* 2017; 5: 448-456.
30. Eisner MD, Katz PP, Yelin EH, et al. Risk factors for hospitalization among adults with asthma: the influence of sociodemographic factors and asthma severity. *Respir Res* 2001; 2: 53-60.
31. Charlson ME, Pompei P, Ales KL, MacKenzie CR. A new method of classifying prognostic comorbidity in longitudinal studies: development and validation. *J Chron Dis* 1987; 40: 373-383.
32. Kvaskoff M, Mu F, Terry KL, Harris HR, Poole EM, Farland L, et al. Endometriosis: a high-risk population for major chronic diseases? *Hum Reprod Update* 2015; 21: 500-506.
33. Htet TD, Teede HJ, de Courten B, Loxton D, Real FG, Moral LJ, et al. Asthma in reproductive-aged women with polycystic ovary syndrome and association with obesity. *Eur Respir J* 2017; in press.
34. British Thoracic Society and Scottish Intercollegiate Guidelines Network. British guideline on the management of asthma. Quick Reference Guide. London, 2016.
35. Rubin DB. Multiple imputation for non-response in surveys. John Wiley, 1987.
36. Austin PC. An introduction to propensity score methods for reducing the effects of confounding in observational studies. *Multivariate Behav Res* 2011; 46: 399-424.
37. Lash TL, Fox MP, Fink AK. Applying quantitative bias analysis to epidemiologic data. Springer, New York, 2009.
38. Andersson T, Alfredsson L, Källberg H, et al. Calculating measures of biological interaction. *Eru J Epidemiol* 2005; 20: 575-579.
39. von Elm E, Altman DG, Egger M, et al. Strengthening the Reporting of Observational Studies in Epidemiology (STROBE) statement: guidelines for reporting observational studies. *BMJ* 2007; 335: 806-808.
40. Bemnchimol EI, Smeeth L, Guttman A, et al. The Reporting of studies Conducted using Observational Routinely-collected health Data (RECORD) statement. *Plos Med* 2015; 12: e1001885.

**The RECORD statement – checklist of items, extended from the STROBE statement, that should be reported in observational studies using routinely collected health data.**

|                           | Item No. | STROBE items                                                                                                                                                                               | Location in manuscript where items are reported | RECORD items                                                                                                                                                                                                                                                                                                                                                                                                                                | Location in manuscript where items are reported |
|---------------------------|----------|--------------------------------------------------------------------------------------------------------------------------------------------------------------------------------------------|-------------------------------------------------|---------------------------------------------------------------------------------------------------------------------------------------------------------------------------------------------------------------------------------------------------------------------------------------------------------------------------------------------------------------------------------------------------------------------------------------------|-------------------------------------------------|
| <b>Title and abstract</b> |          |                                                                                                                                                                                            |                                                 |                                                                                                                                                                                                                                                                                                                                                                                                                                             |                                                 |
|                           | 1        | (a) Indicate the study's design with a commonly used term in the title or the abstract (b) Provide in the abstract an informative and balanced summary of what was done and what was found |                                                 | RECORD 1.1: The type of data used should be specified in the title or abstract. When possible, the name of the databases used should be included.<br><br>RECORD 1.2: If applicable, the geographic region and timeframe within which the study took place should be reported in the title or abstract.<br><br>RECORD 1.3: If linkage between databases was conducted for the study, this should be clearly stated in the title or abstract. | Pages 1-2                                       |
| <b>Introduction</b>       |          |                                                                                                                                                                                            |                                                 |                                                                                                                                                                                                                                                                                                                                                                                                                                             |                                                 |
| Background rationale      | 2        | Explain the scientific background and rationale for the investigation being reported                                                                                                       |                                                 |                                                                                                                                                                                                                                                                                                                                                                                                                                             | Page 3                                          |
| Objectives                | 3        | State specific objectives, including any prespecified hypotheses                                                                                                                           |                                                 |                                                                                                                                                                                                                                                                                                                                                                                                                                             | Page 3                                          |
| <b>Methods</b>            |          |                                                                                                                                                                                            |                                                 |                                                                                                                                                                                                                                                                                                                                                                                                                                             |                                                 |
| Study Design              | 4        | Present key elements of study design early in the paper                                                                                                                                    |                                                 |                                                                                                                                                                                                                                                                                                                                                                                                                                             | Page 4                                          |
| Setting                   | 5        | Describe the setting, locations, and relevant dates, including periods of recruitment, exposure, follow-up, and data collection                                                            |                                                 |                                                                                                                                                                                                                                                                                                                                                                                                                                             | Page 4                                          |
| Participants              | 6        | (a) <i>Cohort study</i> - Give the eligibility criteria, and the                                                                                                                           |                                                 | RECORD 6.1: The methods of study population selection (such as codes or                                                                                                                                                                                                                                                                                                                                                                     | Page 4                                          |

|                                                                                                                                           |                              |                                                                                                                                                                                                                                                                                                                                                                                                                                                                                                                                                                                                                                                             |                                                                                                                                                                                      |                                                                                                                                                                                                                                                                                                                                                                                                                                                                                                                                                                                                                              |           |
|-------------------------------------------------------------------------------------------------------------------------------------------|------------------------------|-------------------------------------------------------------------------------------------------------------------------------------------------------------------------------------------------------------------------------------------------------------------------------------------------------------------------------------------------------------------------------------------------------------------------------------------------------------------------------------------------------------------------------------------------------------------------------------------------------------------------------------------------------------|--------------------------------------------------------------------------------------------------------------------------------------------------------------------------------------|------------------------------------------------------------------------------------------------------------------------------------------------------------------------------------------------------------------------------------------------------------------------------------------------------------------------------------------------------------------------------------------------------------------------------------------------------------------------------------------------------------------------------------------------------------------------------------------------------------------------------|-----------|
| 1<br>2<br>3<br>4<br>5<br>6<br>7<br>8<br>9<br>10<br>11<br>12<br>13<br>14<br>15<br>16<br>17<br>18<br>19<br>20<br>21<br>22<br>23<br>24<br>25 |                              | <p>sources and methods of selection of participants. Describe methods of follow-up</p> <p><i>Case-control study</i> - Give the eligibility criteria, and the sources and methods of case ascertainment and control selection. Give the rationale for the choice of cases and controls</p> <p><i>Cross-sectional study</i> - Give the eligibility criteria, and the sources and methods of selection of participants</p> <p>(b) <i>Cohort study</i> - For matched studies, give matching criteria and number of exposed and unexposed</p> <p><i>Case-control study</i> - For matched studies, give matching criteria and the number of controls per case</p> |                                                                                                                                                                                      | <p>algorithms used to identify subjects) should be listed in detail. If this is not possible, an explanation should be provided.</p> <p>RECORD 6.2: Any validation studies of the codes or algorithms used to select the population should be referenced. If validation was conducted for this study and not published elsewhere, detailed methods and results should be provided.</p> <p>RECORD 6.3: If the study involved linkage of databases, consider use of a flow diagram or other graphical display to demonstrate the data linkage process, including the number of individuals with linked data at each stage.</p> |           |
| 26<br>27<br>28<br>29<br>30<br>31<br>32                                                                                                    | Variables                    | 7                                                                                                                                                                                                                                                                                                                                                                                                                                                                                                                                                                                                                                                           | Clearly define all outcomes, exposures, predictors, potential confounders, and effect modifiers. Give diagnostic criteria, if applicable.                                            | RECORD 7.1: A complete list of codes and algorithms used to classify exposures, outcomes, confounders, and effect modifiers should be provided. If these cannot be reported, an explanation should be provided.                                                                                                                                                                                                                                                                                                                                                                                                              | Pages 4-5 |
| 33<br>34<br>35<br>36<br>37<br>38<br>39<br>40                                                                                              | Data sources/<br>measurement | 8                                                                                                                                                                                                                                                                                                                                                                                                                                                                                                                                                                                                                                                           | For each variable of interest, give sources of data and details of methods of assessment (measurement). Describe comparability of assessment methods if there is more than one group |                                                                                                                                                                                                                                                                                                                                                                                                                                                                                                                                                                                                                              | Page 4    |
| 41<br>42                                                                                                                                  | Bias                         | 9                                                                                                                                                                                                                                                                                                                                                                                                                                                                                                                                                                                                                                                           | Describe any efforts to address potential sources of bias                                                                                                                            |                                                                                                                                                                                                                                                                                                                                                                                                                                                                                                                                                                                                                              | Pages 4-5 |
| 43<br>44<br>45<br>46<br>47                                                                                                                | Study size                   | 10                                                                                                                                                                                                                                                                                                                                                                                                                                                                                                                                                                                                                                                          | Explain how the study size was                                                                                                                                                       |                                                                                                                                                                                                                                                                                                                                                                                                                                                                                                                                                                                                                              | Page 6    |

|                                                                                                                                           |                                  |            |                                                                                                                                                                                                                                                                                                                                                                                                                                                                                                                                                                      |                                                                                                                                                                                                                                                              |
|-------------------------------------------------------------------------------------------------------------------------------------------|----------------------------------|------------|----------------------------------------------------------------------------------------------------------------------------------------------------------------------------------------------------------------------------------------------------------------------------------------------------------------------------------------------------------------------------------------------------------------------------------------------------------------------------------------------------------------------------------------------------------------------|--------------------------------------------------------------------------------------------------------------------------------------------------------------------------------------------------------------------------------------------------------------|
|                                                                                                                                           |                                  | arrived at |                                                                                                                                                                                                                                                                                                                                                                                                                                                                                                                                                                      |                                                                                                                                                                                                                                                              |
| 1<br>2<br>3<br>4<br>5<br>6                                                                                                                | Quantitative variables           | 11         | Explain how quantitative variables were handled in the analyses. If applicable, describe which groupings were chosen, and why                                                                                                                                                                                                                                                                                                                                                                                                                                        | Page 4-5                                                                                                                                                                                                                                                     |
| 7<br>8<br>9<br>10<br>11<br>12<br>13<br>14<br>15<br>16<br>17<br>18<br>19<br>20<br>21<br>22<br>23<br>24<br>25<br>26<br>27<br>28<br>29<br>30 | Statistical methods              | 12         | (a) Describe all statistical methods, including those used to control for confounding<br>(b) Describe any methods used to examine subgroups and interactions<br>(c) Explain how missing data were addressed<br>(d) <i>Cohort study</i> - If applicable, explain how loss to follow-up was addressed<br><i>Case-control study</i> - If applicable, explain how matching of cases and controls was addressed<br><i>Cross-sectional study</i> - If applicable, describe analytical methods taking account of sampling strategy<br>(e) Describe any sensitivity analyses | Page 5                                                                                                                                                                                                                                                       |
| 31<br>32<br>33<br>34<br>35<br>36<br>37<br>38<br>39<br>40<br>41                                                                            | Data access and cleaning methods |            | ..                                                                                                                                                                                                                                                                                                                                                                                                                                                                                                                                                                   | RECORD 12.1: Authors should describe the extent to which the investigators had access to the database population used to create the study population.<br><br>RECORD 12.2: Authors should provide information on the data cleaning methods used in the study. |
| 42<br>43<br>44                                                                                                                            | Linkage                          |            | ..                                                                                                                                                                                                                                                                                                                                                                                                                                                                                                                                                                   | RECORD 12.3: State whether the study included person-level, institutional-                                                                                                                                                                                   |
|                                                                                                                                           |                                  |            |                                                                                                                                                                                                                                                                                                                                                                                                                                                                                                                                                                      | Page 3-4                                                                                                                                                                                                                                                     |
|                                                                                                                                           |                                  |            |                                                                                                                                                                                                                                                                                                                                                                                                                                                                                                                                                                      | N/A                                                                                                                                                                                                                                                          |

|                  |    |                                                                                                                                                                                                                                                                                                                                                 |  |                                                                                                                                                                                                                                                                                                                    |     |
|------------------|----|-------------------------------------------------------------------------------------------------------------------------------------------------------------------------------------------------------------------------------------------------------------------------------------------------------------------------------------------------|--|--------------------------------------------------------------------------------------------------------------------------------------------------------------------------------------------------------------------------------------------------------------------------------------------------------------------|-----|
|                  |    |                                                                                                                                                                                                                                                                                                                                                 |  | level, or other data linkage across two or more databases. The methods of linkage and methods of linkage quality evaluation should be provided.                                                                                                                                                                    |     |
| <b>Results</b>   |    |                                                                                                                                                                                                                                                                                                                                                 |  |                                                                                                                                                                                                                                                                                                                    |     |
| Participants     | 13 | (a) Report the numbers of individuals at each stage of the study ( <i>e.g.</i> , numbers potentially eligible, examined for eligibility, confirmed eligible, included in the study, completing follow-up, and analysed)<br>(b) Give reasons for non-participation at each stage.<br>(c) Consider use of a flow diagram                          |  | RECORD 13.1: Describe in detail the selection of the persons included in the study ( <i>i.e.</i> , study population selection) including filtering based on data quality, data availability and linkage. The selection of included persons can be described in the text and/or by means of the study flow diagram. | N/A |
| Descriptive data | 14 | (a) Give characteristics of study participants ( <i>e.g.</i> , demographic, clinical, social) and information on exposures and potential confounders<br>(b) Indicate the number of participants with missing data for each variable of interest<br>(c) <i>Cohort study</i> - summarise follow-up time ( <i>e.g.</i> , average and total amount) |  |                                                                                                                                                                                                                                                                                                                    | N/A |
| Outcome data     | 15 | <i>Cohort study</i> - Report numbers of outcome events or summary measures over time<br><i>Case-control study</i> - Report numbers in each exposure category, or summary measures of exposure<br><i>Cross-sectional study</i> - Report numbers of outcome events or summary measures                                                            |  |                                                                                                                                                                                                                                                                                                                    | N/A |
| Main results     | 16 | (a) Give unadjusted estimates                                                                                                                                                                                                                                                                                                                   |  |                                                                                                                                                                                                                                                                                                                    | N/A |

|    |                   |                                                                                                                                                                                  |                                                                                                                                                                            |                                                                                                                                                                                                                                                                                                          |     |
|----|-------------------|----------------------------------------------------------------------------------------------------------------------------------------------------------------------------------|----------------------------------------------------------------------------------------------------------------------------------------------------------------------------|----------------------------------------------------------------------------------------------------------------------------------------------------------------------------------------------------------------------------------------------------------------------------------------------------------|-----|
| 1  |                   | and, if applicable, confounder-adjusted estimates and their precision (e.g., 95% confidence interval). Make clear which confounders were adjusted for and why they were included |                                                                                                                                                                            |                                                                                                                                                                                                                                                                                                          |     |
| 2  |                   | (b) Report category boundaries when continuous variables were categorized                                                                                                        |                                                                                                                                                                            |                                                                                                                                                                                                                                                                                                          |     |
| 3  |                   | (c) If relevant, consider translating estimates of relative risk into absolute risk for a meaningful time period                                                                 |                                                                                                                                                                            |                                                                                                                                                                                                                                                                                                          |     |
| 4  |                   |                                                                                                                                                                                  |                                                                                                                                                                            |                                                                                                                                                                                                                                                                                                          |     |
| 5  |                   |                                                                                                                                                                                  |                                                                                                                                                                            |                                                                                                                                                                                                                                                                                                          |     |
| 6  |                   |                                                                                                                                                                                  |                                                                                                                                                                            |                                                                                                                                                                                                                                                                                                          |     |
| 7  |                   |                                                                                                                                                                                  |                                                                                                                                                                            |                                                                                                                                                                                                                                                                                                          |     |
| 8  |                   |                                                                                                                                                                                  |                                                                                                                                                                            |                                                                                                                                                                                                                                                                                                          |     |
| 9  |                   |                                                                                                                                                                                  |                                                                                                                                                                            |                                                                                                                                                                                                                                                                                                          |     |
| 10 |                   |                                                                                                                                                                                  |                                                                                                                                                                            |                                                                                                                                                                                                                                                                                                          |     |
| 11 |                   |                                                                                                                                                                                  |                                                                                                                                                                            |                                                                                                                                                                                                                                                                                                          |     |
| 12 |                   |                                                                                                                                                                                  |                                                                                                                                                                            |                                                                                                                                                                                                                                                                                                          |     |
| 13 |                   |                                                                                                                                                                                  |                                                                                                                                                                            |                                                                                                                                                                                                                                                                                                          |     |
| 14 |                   |                                                                                                                                                                                  |                                                                                                                                                                            |                                                                                                                                                                                                                                                                                                          |     |
| 15 | Other analyses    | 17                                                                                                                                                                               | Report other analyses done—e.g., analyses of subgroups and interactions, and sensitivity analyses                                                                          |                                                                                                                                                                                                                                                                                                          | N/A |
| 16 |                   |                                                                                                                                                                                  |                                                                                                                                                                            |                                                                                                                                                                                                                                                                                                          |     |
| 17 |                   |                                                                                                                                                                                  |                                                                                                                                                                            |                                                                                                                                                                                                                                                                                                          |     |
| 18 |                   |                                                                                                                                                                                  |                                                                                                                                                                            |                                                                                                                                                                                                                                                                                                          |     |
| 19 |                   |                                                                                                                                                                                  |                                                                                                                                                                            |                                                                                                                                                                                                                                                                                                          |     |
| 20 | <b>Discussion</b> |                                                                                                                                                                                  |                                                                                                                                                                            |                                                                                                                                                                                                                                                                                                          |     |
| 21 | Key results       | 18                                                                                                                                                                               | Summarise key results with reference to study objectives                                                                                                                   |                                                                                                                                                                                                                                                                                                          | N/A |
| 22 |                   |                                                                                                                                                                                  |                                                                                                                                                                            |                                                                                                                                                                                                                                                                                                          |     |
| 23 | Limitations       | 19                                                                                                                                                                               | Discuss limitations of the study, taking into account sources of potential bias or imprecision. Discuss both direction and magnitude of any potential bias                 | RECORD 19.1: Discuss the implications of using data that were not created or collected to answer the specific research question(s). Include discussion of misclassification bias, unmeasured confounding, missing data, and changing eligibility over time, as they pertain to the study being reported. | N/A |
| 24 |                   |                                                                                                                                                                                  |                                                                                                                                                                            |                                                                                                                                                                                                                                                                                                          |     |
| 25 |                   |                                                                                                                                                                                  |                                                                                                                                                                            |                                                                                                                                                                                                                                                                                                          |     |
| 26 |                   |                                                                                                                                                                                  |                                                                                                                                                                            |                                                                                                                                                                                                                                                                                                          |     |
| 27 |                   |                                                                                                                                                                                  |                                                                                                                                                                            |                                                                                                                                                                                                                                                                                                          |     |
| 28 |                   |                                                                                                                                                                                  |                                                                                                                                                                            |                                                                                                                                                                                                                                                                                                          |     |
| 29 |                   |                                                                                                                                                                                  |                                                                                                                                                                            |                                                                                                                                                                                                                                                                                                          |     |
| 30 |                   |                                                                                                                                                                                  |                                                                                                                                                                            |                                                                                                                                                                                                                                                                                                          |     |
| 31 |                   |                                                                                                                                                                                  |                                                                                                                                                                            |                                                                                                                                                                                                                                                                                                          |     |
| 32 | Interpretation    | 20                                                                                                                                                                               | Give a cautious overall interpretation of results considering objectives, limitations, multiplicity of analyses, results from similar studies, and other relevant evidence |                                                                                                                                                                                                                                                                                                          | N/A |
| 33 |                   |                                                                                                                                                                                  |                                                                                                                                                                            |                                                                                                                                                                                                                                                                                                          |     |
| 34 |                   |                                                                                                                                                                                  |                                                                                                                                                                            |                                                                                                                                                                                                                                                                                                          |     |
| 35 |                   |                                                                                                                                                                                  |                                                                                                                                                                            |                                                                                                                                                                                                                                                                                                          |     |
| 36 |                   |                                                                                                                                                                                  |                                                                                                                                                                            |                                                                                                                                                                                                                                                                                                          |     |
| 37 |                   |                                                                                                                                                                                  |                                                                                                                                                                            |                                                                                                                                                                                                                                                                                                          |     |
| 38 |                   |                                                                                                                                                                                  |                                                                                                                                                                            |                                                                                                                                                                                                                                                                                                          |     |
| 39 |                   |                                                                                                                                                                                  |                                                                                                                                                                            |                                                                                                                                                                                                                                                                                                          |     |
| 40 |                   |                                                                                                                                                                                  |                                                                                                                                                                            |                                                                                                                                                                                                                                                                                                          |     |
| 41 | Generalisability  | 21                                                                                                                                                                               | Discuss the generalisability (external validity) of the study results                                                                                                      |                                                                                                                                                                                                                                                                                                          | N/A |
| 42 |                   |                                                                                                                                                                                  |                                                                                                                                                                            |                                                                                                                                                                                                                                                                                                          |     |
| 43 |                   |                                                                                                                                                                                  |                                                                                                                                                                            |                                                                                                                                                                                                                                                                                                          |     |
| 44 |                   |                                                                                                                                                                                  |                                                                                                                                                                            |                                                                                                                                                                                                                                                                                                          |     |

| Other Information                                         |    |                                                                                                                                                               |  |                                                                                                                                                          |        |
|-----------------------------------------------------------|----|---------------------------------------------------------------------------------------------------------------------------------------------------------------|--|----------------------------------------------------------------------------------------------------------------------------------------------------------|--------|
| Funding                                                   | 22 | Give the source of funding and the role of the funders for the present study and, if applicable, for the original study on which the present article is based |  |                                                                                                                                                          | Page 6 |
| Accessibility of protocol, raw data, and programming code |    | ..                                                                                                                                                            |  | RECORD 22.1: Authors should provide information on how to access any supplemental information such as the study protocol, raw data, or programming code. | N/A    |

\*Reference: Benchimol EI, Smeeth L, Guttman A, Harron K, Moher D, Petersen I, Sørensen HT, von Elm E, Langan SM, the RECORD Working Committee. The REporting of studies Conducted using Observational Routinely-collected health Data (RECORD) Statement. *PLoS Medicine* 2015; in press.

\*Checklist is protected under Creative Commons Attribution ([CC BY](https://creativecommons.org/licenses/by/4.0/)) license.



# BMJ Open

## Exogenous sex steroid hormones and asthma in females: protocol for a population-based retrospective cohort study using a UK primary care database

|                                 |                                                                                                                                                                                                                                                                                                                                                                                                                                                                                                                                                                                                                                                                                                                                                                                                                                                                            |
|---------------------------------|----------------------------------------------------------------------------------------------------------------------------------------------------------------------------------------------------------------------------------------------------------------------------------------------------------------------------------------------------------------------------------------------------------------------------------------------------------------------------------------------------------------------------------------------------------------------------------------------------------------------------------------------------------------------------------------------------------------------------------------------------------------------------------------------------------------------------------------------------------------------------|
| Journal:                        | <i>BMJ Open</i>                                                                                                                                                                                                                                                                                                                                                                                                                                                                                                                                                                                                                                                                                                                                                                                                                                                            |
| Manuscript ID                   | bmjopen-2017-020075.R2                                                                                                                                                                                                                                                                                                                                                                                                                                                                                                                                                                                                                                                                                                                                                                                                                                                     |
| Article Type:                   | Protocol                                                                                                                                                                                                                                                                                                                                                                                                                                                                                                                                                                                                                                                                                                                                                                                                                                                                   |
| Date Submitted by the Author:   | 16-May-2018                                                                                                                                                                                                                                                                                                                                                                                                                                                                                                                                                                                                                                                                                                                                                                                                                                                                |
| Complete List of Authors:       | Nwaru, Bright; University of Gothenburg, Institute of Medicine, Krefting Research Centre<br>Simpson, Colin; The University of Edinburgh, Usher Institute of Population Health Sciences and Informatics<br>Soyiri, Ireneous; University of Edinburgh, Usher Institute of Population Health Sciences and Informatics<br>Pillinger, Rebecca; University of Edinburgh, Usher Institute of Population Health Sciences and Informatics<br>Appiagyei, Francis; Optimum Patient Care<br>Ryan, Dermot; University of Edinburgh, Allergy and Respiratory Research Group<br>Critchley, Hilary; University of Edinburgh, Obstetrics and Gynaecology<br>Price, David; Optimum Patient Care<br>Hawrylowicz, Catherine; King's College London, MRC and Asthma UK Centre for Allergic Mechanisms in Asthma<br>Sheikh, Aziz; University of Edinburgh, Division of Community Health Sciences |
| <b>Primary Subject Heading</b>: | Epidemiology                                                                                                                                                                                                                                                                                                                                                                                                                                                                                                                                                                                                                                                                                                                                                                                                                                                               |
| Secondary Subject Heading:      | Respiratory medicine                                                                                                                                                                                                                                                                                                                                                                                                                                                                                                                                                                                                                                                                                                                                                                                                                                                       |
| Keywords:                       | Asthma < THORACIC MEDICINE, females, hormonal contraception, hormone replacement therapy, oestrogen, progesterone                                                                                                                                                                                                                                                                                                                                                                                                                                                                                                                                                                                                                                                                                                                                                          |
|                                 |                                                                                                                                                                                                                                                                                                                                                                                                                                                                                                                                                                                                                                                                                                                                                                                                                                                                            |

SCHOLARONE™  
Manuscripts

1  
2  
3 **Exogenous sex steroid hormones and asthma in females: protocol for a population-**  
4 **based retrospective cohort study using a UK primary care database**

5  
6 Bright I Nwaru,<sup>1,2,3</sup> Colin R Simpson,<sup>3</sup> Ireneous N Soyiri,<sup>3</sup> Rebecca Pillinger,<sup>3</sup> Francis  
7 Appiagyei,<sup>4</sup> Dermot Ryan,<sup>3,4</sup> Hilary Critchley,<sup>5</sup> David Price,<sup>4,6,7</sup> Catherine M Hawrylowicz,<sup>8</sup>  
8 Aziz Sheikh<sup>3</sup>

9  
10 <sup>1</sup>Krefting Research Centre, Institute of Medicine, University of Gothenburg, Sweden

11 <sup>2</sup>Wallenberg Centre for Molecular and Translational Medicine, Institute of Medicine,  
12 University of Gothenburg, Sweden

13 <sup>3</sup>Asthma UK Centre for Applied Research, Centre for Medical Informatics, The Usher Institute  
14 of Population Health Sciences and Informatics, The University of Edinburgh, Edinburgh, UK

15 <sup>4</sup>Optimum Patient Care, 5 Coles Lane, Cambridge, UK

16 <sup>5</sup>Medical Research Council Centre for Reproductive Health, Queen's Medical Research  
17 Institute, University of Edinburgh, UK

18 <sup>6</sup>Academic Primary Care, Division of Applied Health Sciences, University of Aberdeen

19 <sup>7</sup>Observational and Pragmatic Research Institute, Singapore

20 <sup>8</sup>MRC-Asthma UK Centre in Allergic Mechanisms of Asthma, Division of Asthma, Allergy and  
21 Lung Biology, Guys Hospital, Kings College London, UK

22  
23 Correspondence to:

24 Bright Nwaru

25 Krefting Research Centre

26 Institute of Medicine

27 University of Gothenburg

28 SE-405 30 Gothenburg, Sweden

29  
30 Email: [bright.nwaru@gu.se](mailto:bright.nwaru@gu.se)

31 **Keywords**

32 asthma, females, hormonal contraception, hormone replacement therapy, oestrogen,  
33 progesterone, sex hormones.  
34  
35

36 **Running head: Exogenous sex hormones and asthma in females**  
37  
38  
39  
40  
41  
42  
43  
44  
45  
46  
47  
48  
49  
50  
51  
52  
53  
54  
55  
56  
57  
58  
59  
60

## ABSTRACT

**Introduction:** Female sex steroid hormones have been implicated in sex-related differences in the development and clinical outcomes of asthma. The role of exogenous sex steroids however remains unclear. Our recent systematic review highlighted the lack of high quality population-based studies investigating this subject. We aim to investigate whether the use of hormonal contraception and hormone replacement therapy (HRT), subtypes, and route of administration are associated with asthma onset and clinical outcomes in reproductive age and peri-menopausal/post-menopausal females.

**Methods and analysis:** Using the Optimum Patient Care Research Database (OPCRD), a national primary care database in the UK, we will construct a retrospective longitudinal cohort of reproductive age (16-45 years) and peri-menopausal/post-menopausal (46-70years) females. We will estimate the risk of new-onset asthma using Cox regression and multilevel modelling for repeated asthma outcomes, such as asthma attacks. We will adjust for confounding factors in all analyses. We will evaluate interactions between the use of exogenous sex hormones and body mass index and smoking by calculating the relative excess risk due to interaction and the attributable proportion due to interaction. With 90% power, we need 23,700 reproductive age females to detect a 20% reduction (risk ratio 0.8) in asthma attacks for use of any hormonal contraception and 6,000 peri-menopausal/post-menopausal females to detect a 40% (risk ratio 1.40) increased risk of asthma attacks for use of any HRT.

**Ethics and dissemination:** We have obtained approval (ADEPT1317) from the Anonymised Data Ethics and Protocol Transparency (ADEPT) Committee, which grants project-specific ethics approvals for the use of OPCR data. Optimum Patient Care has an existing NHS Health Research Authority ethics approval for the use of OPCR data for research (15/EM/150). We will present our findings at national and international scientific meetings and publish the results in international peer-reviewed journals.

**Protocol registration:** The study protocol is registered with the European Union electronic Register of Post-Authorisation Studies (EUPAS22967).

### Strengths and limitations of this study

- The longitudinal nature of this study will fill an important gap in the evidence base as there is a paucity of longitudinal studies investigating the role of exogenous sex steroid hormones in asthma in females
- As a study based on primary care database, both exposure and outcome measures will be objectively defined
- This study is based on the general and unselected population; therefore, our findings will be generalizable to the general population of reproductive age and peri-menopausal/post-menopausal females
- Overall, this study will inform the direction for further mechanistic and interventional works
- A limitation of this work is that we will define reproductive and menopausal status of females based only on the ages of women, which is the only information available from the GP database for this purpose

## INTRODUCTION

Asthma is more common in boys than girls during early childhood.<sup>1-3</sup> However, after puberty, the prevalence and severity of asthma are higher in females than males.<sup>1-3</sup> Female sex steroid hormones are believed, at least in part, to explain these sex-related variations in asthma outcomes.<sup>1-3</sup> Variations in asthma incidence and clinical outcomes are seen to follow the hormonal transitional points in the female reproductive life course, in particular, puberty, menarche, menstruation, pregnancy and menopause.<sup>1,4</sup> Fluctuations in oestradiol and progesterone levels during the menstrual cycle have been linked to worsening of asthma symptoms in females,<sup>5</sup> although immunological mechanisms underlying these effects have not been defined. In comparison to non-menopausal females, transitional menopausal females and both early and late post-menopausal females were at increased risk of new-onset asthma. In primary studies, the role of menopause on risk of current symptoms of asthma were equivocal,<sup>6</sup> but a recent meta-analysis of these studies showed a moderately increased risk.<sup>7</sup>

Both oestrogen and progesterone influence smooth muscle functions, inflammation, and airway responsiveness.<sup>8-10</sup> Studies in animal models indicate that oestrogen increases T-helper (Th) 2 cell responses associated with allergic asthma.<sup>10</sup> A recent study showed that in patients with severe asthma, both oestrogen and progesterone were associated with a decrease in the expression of the left-7f microRNA as well as an increase in interleukin (IL)-23/IL-23 receptor signalling and IL-17A production, an effect that was more marked in women versus men.<sup>11</sup> Some evidence suggests that external suppression of endogenous sex steroid production through the use of exogenous hormonal contraception may improve asthma outcomes,<sup>12-17</sup> whereas the use of hormone replacement therapy (HRT) by menopausal women may increase the risk of new onset asthma and risk of poor clinical outcomes of asthma.<sup>18-23</sup> Females with asthma exhibit enhanced Th17 responses, reduced asthma symptoms, and improved lung function when using hormonal contraception.<sup>5,9,10,24,25</sup>

The role of use of hormonal contraceptives both in the development of new-onset asthma<sup>23,26</sup> and manifestation of current symptoms of asthma<sup>16</sup> has been conflicting. Using the serial cross-sectional Scottish Health Surveys, we recently observed substantial reductions in asthma exacerbations and hospital episodes in females using hormonal contraception compared to those not using hormonal contraception.<sup>15</sup> This work was followed by a comprehensive synthesis of the underlying evidence, which revealed inherent methodological limitations in previous studies on the topic, including a paucity of prospective longitudinal studies and limitations in the measurement of sex steroids and asthma outcomes.<sup>7</sup> To overcome these weaknesses and thus clarify whether the role of sex steroid hormones in asthma in females is causal, well-designed long-term longitudinal studies with well-characterised populations are required. We plan to investigate the role of exogenous sex steroid hormones in the development of asthma and manifestation of clinical and patient-reported outcomes in females by creating a retrospective longitudinal cohort of reproductive age and peri-menopausal/postmenopausal females using the Optimum Patient Care Research Database (OPCRD). Specifically, we aim to investigate the:

1. Associations between use of hormonal contraception and asthma onset, attacks, severity, mortality and health-related quality of life (HRQoL) in reproductive age females.
2. Impact of type of menopause (surgical vs non-surgical) and use of HRT on asthma onset, attacks, severity, mortality and HRQoL in peri-menopausal/post-menopausal females.
3. Interactions between exogenous sex hormones, body mass index (BMI), cigarette smoking and alcohol consumption in these associations.

## METHODS

### *Ethics approvals and permissions*

1  
2  
3 The main ethical issues relate to anonymity, confidentiality, data protection and the linkage of  
4 datasets. We have obtained approval (reference number: ADEPT1317) from the Anonymised  
5 Data Ethics and Protocol Transparency (ADEPT) Committee, which grants project-specific  
6 approvals for the use of the OPCRd data. Optimum Patient Care has an existing NHS Health  
7 Research Authority ethics approval for the use of OPCRd for research (REC Ref:  
8 15/EM/150). All researchers involved in data analysis will have successfully completed the  
9 appropriate information governance courses.

### 10 **Patient and Public Involvement**

11 In developing the study protocol at the grant application stage, we worked closely with the  
12 members of the Patient and Public Involvement (PPI) group of the Asthma UK Centre for  
13 Applied Research, University of Edinburgh. Selected members of the PPI helped with the  
14 grant application, including commenting and refining the plain English summary of the  
15 application, and ensuring that the public perspectives are thoroughly embedded throughout  
16 the research plans. We will also invite the PPI group to comment on the findings of the study,  
17 play an active part in developing the key messages from the study for public consumption,  
18 and help in disseminating our findings to the public via website, social media, conferences  
19 and public engagement events around the study.

### 21 **Study design and population**

22 OPCRd is a bespoke longitudinal de-identified primary care database representing over 600  
23 general practices across the UK and is regularly used to conduct epidemiological, clinical,  
24 and pharmaceutical research ([www. http://optimumpatientcare.org/opcrd/](http://optimumpatientcare.org/opcrd/)). A major  
25 advantage of the OPCRd database is the focus on respiratory outcomes; in up to 10% of  
26 patients with asthma, patient-reported questionnaire data on asthma outcomes are available.  
27 This provides the opportunity to study both clinical and patient-reported outcomes from the  
28 database. The study population for the present investigation will comprise all 16-70-year-old  
29 females in OPCRd. We will construct two independent cohorts to address the study  
30 objectives, namely:

- 32 1. Reproductive age females (16-45 years old) to study the associations between use of  
33 hormonal contraception and the study outcomes
- 34 2. Peri-menopausal (46-55 years old)/post-menopausal females (56-70 years old) to  
35 study the associations between type of menopause and HRT and the study  
36 outcomes.

### 38 **Exposures**

39 We will ascertain the use of hormonal contraception and HRT and type of menopause by  
40 means of the Read Clinical Classification System (Read codes).<sup>27,28</sup> We will define the  
41 following exposures:

- 42 1. Reproductive age females: use of hormonal contraception versus non-use of  
43 hormonal contraception; subtypes (oestrogen/progestogen combined, progestogen  
44 only versus non-use of hormonal contraception); route of administration (transdermal,  
45 subcutaneous, intramuscular, local intrauterine versus oral route), and frequency and  
46 duration of use (as a count exposure).
- 47 2. Menopausal status: peri-menopausal (46-55 years) versus non-menopausal (<46  
48 years); post-menopausal (56-70 years) versus non-menopausal (<46 years)
- 49 3. Peri-menopausal/post-menopausal females: use of HRT versus non-HRT use,  
50 subtypes (oestrogen/ progestogen combined, oestrogen-only versus non-HRT use),  
51 route of administration (transdermal, subcutaneous, local intrauterine versus oral  
52 route), and frequency and duration of use (as a count exposure).

### 54 **Confounders**

55 Potential confounders will be extracted from the database using their respective Read codes,  
56 including age, parity, BMI, smoking, current use of asthma treatments and level of adherence  
57

1  
2  
3 to these using our definition based on the algorithm developed within the OPCRD<sup>29</sup>, Index of  
4 Multiple Deprivation (IMD),<sup>30</sup> co-morbidity based on the Charlson index,<sup>31</sup> and other  
5 indications for use of hormonal contraception (e.g. endometriosis, polycystic ovary syndrome  
6 (PCOS), menorrhagia, acne, and metrorrhagia) and HRT (e.g. onset of menopause,  
7 endometriosis, and indicators for hysterectomy for symptomatic uterine fibroids, and heavy  
8 menstrual bleeding) besides contraception and symptoms of menopausal transition,  
9 respectively. Endometriosis<sup>32</sup> and PCOS,<sup>33</sup> key indicators for the use of hormonal  
10 contraceptives among reproductive age women, have been linked to risk of asthma;  
11 therefore are important confounders in the association between use of hormonal  
12 contraceptives and asthma. For HRT, the onset of menopause itself and hysterectomy, other  
13 indicators for use of HRT besides symptoms of menopausal transition, have also been linked  
14 to asthma.<sup>6,21</sup>

### 15 **Outcomes**

16 The primary outcomes will include new-onset asthma, asthma attacks and severity. New-  
17 onset asthma will be defined as the first GP-recorded asthma event (including diagnosis,  
18 hospitalisation, medication prescription, or any other asthma event) occurring at least five  
19 years from the start of the follow-up date. We will exclude individuals with a relevant asthma  
20 event recorded up to five years after the start of follow-up date. We assume that within a 5-  
21 year period an asthma patient should have had at least one clinical encounter. Asthma  
22 attacks and severity will be defined based on the frequency of GP consultation, A&E  
23 attendance, oral steroid courses and hospital admissions for asthma. Using these  
24 parameters and based on algorithm we have now developed within the OPCRD database,  
25 patients will be classified according to the British Thoracic Society (BTS) and Scottish  
26 Intercollegiate Guidelines Network (SIGN) asthma severity steps.<sup>34</sup> The outcomes will be  
27 determined using relevant Read codes. The secondary outcomes will include patient-  
28 reported asthma symptoms, medication use and HRQoL. Data on HRQoL will be assessed  
29 from patient-completed questionnaires on asthma symptoms and quality of life, which is an  
30 adjunct data collected from about 10% of patients and added to the OPCRD database.

### 31 **Follow-up period**

32 We will follow the participants from baseline starting from 1 January 2000 or date of  
33 registration until 30 June 2017. With regards to onset of asthma, exit date from the cohort will  
34 be defined as the date of first diagnosis of asthma (i.e. date of first record of an asthma  
35 encounter), death, deregistration from a practice, or end of follow-up (30 June 2017),  
36 whichever comes first.

### 37 **Statistical analyses**

38 Prior to the main analyses, the data will undergo relevant quality checks, including relevant  
39 variable categorisation (re-scaling where appropriate) and checks for missingness. We will  
40 undertake a complete case analysis and also perform multiple imputation for variables with  
41 missing values. We will perform 20 imputations in order to enhance the efficiency of the  
42 estimates and will use Rubin's rule to combine the estimates across the 20 datasets.<sup>35</sup>  
43 Where the specific time of onset of asthma is observable, we will perform survival analysis  
44 using the log-rank test to describe the survival functions of the groups as defined by use of  
45 sex hormones. We will use Cox proportional hazards regression to study the associations  
46 between exogenous sex hormones and the first record of an asthma event. Multilevel  
47 modelling will be used to estimate associations where the outcomes are repeated, e.g.  
48 number of asthma attacks and medication use. Since the change in hormone levels with  
49 contraceptive use is expected to differ between women, random coefficient models will be  
50 fitted, so that in turn the relationship between contraception use and asthma outcomes can  
51 differ between women. We will undertake analyses incorporating propensity scores using  
52 matching (exposed vs. unexposed).<sup>36</sup> The model will be non-parsimonious in order to include  
53 a wide range of factors that influence propensity to be prescribed hormonal contraceptives  
54  
55  
56  
57  
58  
59  
60

1  
2  
3 and HRT. To minimise potential biases, we will undertake different scenarios of sensitivity  
4 analyses in order to evaluate the robustness of our findings, including analyses for potential  
5 selection bias at baseline, unmeasured confounding and information bias.<sup>37</sup> These sets of  
6 bias analyses will be aided by deriving relevant internal data from a subset of the study  
7 population where possible. Alternatively, we will obtain external validation data (for instance,  
8 from the Secure Anonymised Information Linkage [SAIL] in Wales) that will provide the basis  
9 for defining the sensitivities of the different measures and allow appropriate adjustments to  
10 be made to our estimates. We will also evaluate the potential of confounding by indication  
11 bias by stratifying the analyses by the relevant disease indication for using sex steroid  
12 preparations as indicated above in the section on confounding. To estimate the potential  
13 interactions between sex hormones and BMI and cigarette smoking, we will calculate the  
14 relative excess risk due to interaction and the attributable proportion due to interaction.<sup>38</sup> All  
15 estimates will be accompanied by their respective 95% confidence intervals. Statistical  
16 analyses will be undertaken using R statistical software.

### 19 **Sample size estimation**

20 Given estimates of our previous exploratory analysis using the Scottish Health Surveys (31%  
21 using any hormonal contraception, 6.5% with clinician-diagnosed asthma, and an odds ratio  
22 of 0.68, 95% confidence interval 0.47-0.98),<sup>15</sup> we determined that in order to have 90%  
23 power at an alpha level of 0.05 to detect up to 20% reduction (risk ratio 0.8) in asthma  
24 attacks, we will need a sample size of 23,700 reproductive age females for use of any  
25 hormonal contraception. Furthermore, with 90% power at an alpha level of 0.05, we  
26 determined that we will need 6,000 peri-menopausal/post-menopausal females to detect up  
27 to 40% (risk ratio 1.40) increased risk of asthma attack for use of any HRT.<sup>23</sup> Currently, the  
28 OPCR database has over 5 million population of patients; we anticipate that about five  
29 hundred thousand patients will meet the criteria for inclusion into this study.

### 31 **Reporting and dissemination plans**

32 We will report the findings of the study following the recommendations of STROBE  
33 (Strengthening the Reporting of Observational Studies in Epidemiology)<sup>39</sup> and RECORD  
34 (Reporting of studies Conducted using Observational Routinely-collected health Data).<sup>40</sup> All  
35 the analysis source codes will be made available at GitHub website at  
36 <https://github.com/asthmalhs>. The project findings will be presented at national and  
37 international scientific meetings and published in international journals. Furthermore, we will  
38 capitalise on the dissemination infrastructures of the Asthma UK Centre for Applied  
39 Research (e.g. the Twitter feed and dynamic website) and the University of Gothenburg to  
40 publicise our findings to clinicians, academics, patients, and reproductive health channels.

### 42 **Funding**

43 This work was supported by Asthma UK, grant number: AUK-IG-2016-346. BN, INS, CRS,  
44 and AS were in addition support by the Farr Institute and Asthma UK Centre for Applied  
45 Research. BN acknowledges the support of Knut and Alice Wallenberg Foundation and the  
46 Wallenberg Centre for Molecular and Translational Medicine, University of Gothenburg,  
47 Sweden

### 49 **Conflict of interests**

50 The authors declare no conflict of interest related to this work.

### 52 **Authors' contribution**

53 BN and AS conceived the idea for this work. It was drafted by BN and was then revised after  
54 several rounds of critical comments from CRS, CMH, and AS and additional feedback from  
55 INS, RP, HC, FA, DR, and DP.

## REFERENCES

1. Baibergenova A, Thabane L, Akhtar-Danesh N, et al. Sex differences in hospital admissions from emergency departments in asthmatic adults: a population-based study. *Ann Allergy Asthma Immunol*. 2006; 96: 66-672.
2. Osman M, Hansell AL, Simpson CR, et al. Gender-specific presentations for asthma, allergic rhinitis and eczema in primary care. *Prim Care Respir J* 2007; 16: 28-35
3. Prescott E, Lange P, Vestbo J, et al. Effect of gender on hospital admissions for asthma and prevalence of self-reported asthma: a prospective study based on a sample of the general population. *Thorax* 1997; 52: 287-289.
4. Kynyk JA, Mastronarde JG, McCallister JW. Asthma, the sex difference. *Current Opinion in Pulmonary Medicine* 2011; 17: 6-11.
5. Bonds RS, Midoro-Horiuti T. Estrogen effects in allergy and asthma. *Curr Opin Allergy Clin Immunol* 2013; 13: 92-99.
6. Triebner K, Johannessen A, Puggini L, Benediktsdottir B, Bertelsen RJ, Bifulco E, et al. Menopause as a predictor of new-onset asthma: a longitudinal Northern European population study. *J Allergy Clin Immunol* 2016; 137: 50-57.
7. McCleary N, Nwaru BI, Nurmatov UB, Critchley H, Sheikh A. Endogenous and exogenous sex steroid hormones in asthma and allergy in females: a systematic review and meta-analysis. *J Allergy Clin Immunol*. In press
8. Haggerty CL, Ness RB, Kelsey S, et al. The impact of estrogen and progesterone on asthma. *Ann Allergy Asthma Immunol* 2003; 90: 284-91.
9. Verthelyi D. Female's heightened immune status: estrogen, T cells, and inducible nitric oxide synthase in the balance. *Endocrinology* 2006; 147:659-61.
10. Fuseini H, Newcomb DC. Mechanisms driving gender differences in asthma. *Curr Allergy Asthma Rep*. In press.
11. Newcomb DC, Cephus JY, Boswell MG, et al. Estrogen and progesterone decrease let-7f microRNA expression and increase IL-23/IL-23 receptor signaling and IL-17A production in patients with severe asthma. *J Allergy Clin Immunol* 2015; 136: 25-34.
12. Forbes L, Jarvis D, Burney P. Do hormonal contraceptives influence asthma severity? *European Respiratory Journal* 1999; 14: 1028-33.
13. Jenkins MA, Dharmage SC, Flander LB, et al. Parity and decreased use of oral contraceptives as predictors of asthma in young women. *Clinical and Experimental Allergy* 2006; 36: 609-13.
14. Lange P, Parner J, Prescott E, Ulrik CS, Vestbo J. Exogenous female sex steroid hormones and risk of asthma and asthma-like symptoms: a cross sectional study of the general population. *Thorax* 2001; 56: 613-6.
15. Nwaru BI, Sheikh A. Hormonal contraceptives and asthma in women of reproductive age: analysis of data from serial national Scottish Health Surveys. *Journal of the Royal Society of Medicine* 2015; 108: 358-71.
16. Scott HA, Gibson PG, Garg ML, Upham JW, Wood LG. Sex hormones and systemic inflammation are modulators of the obese-asthma phenotype. *Allergy*. 2016; 71: 1037-1047.
17. Salam MT, Wenten M, Gilliland FD. Endogenous and exogenous sex steroid hormones and asthma and wheeze in young women. *Journal of Allergy and Clinical Immunology* 2006; 117(5): 1001-7.
18. Barr RG, Wentowski CC, Grodstein F, et al. Prospective study of postmenopausal hormone use and newly diagnosed asthma and chronic obstructive pulmonary disease. *Archives of Internal Medicine* 2004; 164: 379-86.
19. Gomez Real F, Svanes C, Bjornsson EH, et al. Hormone replacement therapy, body mass index and asthma in perimenopausal women: A cross sectional survey. *Thorax* 2006; 61: 34-40.
20. Jarvis D, Leynaert B. The association of asthma, atopy and lung function with hormone replacement therapy and surgical cessation of menstruation in a population-based sample of English women. *Allergy* 2008; 63: 95-102.



21. Romieu I, Fabre A, Fournier A, et al. Postmenopausal hormone therapy and asthma onset in the E3N cohort. *Thorax* 2010; 65: 292-297.
22. Tattersfield AE. Is postmenopausal HRT a risk factor for adult-onset asthma? *Thorax* 2010; 65: 282-
23. Troisi RJ, Speizer FE, Willett WC, Trichopoulos D, Rosner B. Menopause, postmenopausal estrogen preparations, and the risk of adult-onset asthma: A prospective cohort study. *American Journal of Respiratory and Critical Care Medicine* 1995; 152: 1183-1188.
24. Chandler MH, Schuldheisz S, Phillips BA, et al. Premenstrual asthma: the effect of estrogen on symptoms, pulmonary function, and beta 2-receptors. *Pharmacotherapy* 1997; 17: 224-234.
25. Matsuo N, Shimoda T, Matsuse H, et al. A case of menstruation-associated asthma: treatment with oral contraceptives. *Chest* 1999; 116: 252-253.
26. Wie J, Gerlich J, Genuet J, Nowak D, Vogelberg C, von Mutius E, et al. Hormonal factors and incident asthma and allergic rhinitis during puberty in girls. *Ann Allergy Asthma Immunol* 2015; 115: 21-27.
27. Williams T, van Staa T, Puri S, Eaton S. Recent advances and use of the General Practice Research Database as an example of a UK Primary Care Data resource. *Ther Adv Drug Saf* 2012; 3: 89-99.
28. Quint JK, Müllerova H, DiSantostefano RL, Forbes H, et al. Validation of chronic obstructive pulmonary disease recording in the Clinical Practice Research Datalink (CPRD-GOLD). *BMJ Open* 2014; 4: e005540.
29. Souverein PC, Koster ES, Colice G, van Ganse E, Chisholm A, Price D, et al. Inhaler corticosteroid adherence patterns in a longitudinal asthma cohort. *J Allergy Clin Immunol Pract* 2017; 5: 448-456.
30. Eisner MD, Katz PP, Yelin EH, et al. Risk factors for hospitalization among adults with asthma: the influence of sociodemographic factors and asthma severity. *Respir Res* 2001; 2: 53-60.
31. Charlson ME, Pompei P, Ales KL, MacKenzie CR. A new method of classifying prognostic comorbidity in longitudinal studies: development and validation. *J Chron Dis* 1987; 40: 373-383.
32. Kvaskoff M, Mu F, Terry KL, Harris HR, Poole EM, Farland L, et al. Endometriosis: a high-risk population for major chronic diseases? *Hum Reprod Update* 2015; 21: 500-506.
33. Htet TD, Teede HJ, de Courten B, Loxton D, Real FG, Moral LJ, et al. Asthma in reproductive-aged women with polycystic ovary syndrome and association with obesity. *Eur Respir J* 2017; in press.
34. British Thoracic Society and Scottish Intercollegiate Guidelines Network. British guideline on the management of asthma. Quick Reference Guide. London, 2016.
35. Rubin DB. Multiple imputation for non-response in surveys. John Wiley, 1987.
36. Austin PC. An introduction to propensity score methods for reducing the effects of confounding in observational studies. *Multivariate Behav Res* 2011; 46: 399-424.
37. Lash TL, Fox MP, Fink AK. Applying quantitative bias analysis to epidemiologic data. Springer, New York, 2009.
38. Andersson T, Alfredsson L, Källberg H, et al. Calculating measures of biological interaction. *Eru J Epidemiol* 2005; 20: 575-579.
39. von Elm E, Altman DG, Egger M, et al. Strengthening the Reporting of Observational Studies in Epidemiology (STROBE) statement: guidelines for reporting observational studies. *BMJ* 2007; 335: 806-808.
40. Bemnchamol EI, Smeeth L, Guttman A, et al. The Reporting of studies Conducted using Observational Routinely-collected health Data (RECORD) statement. *Plos Med* 2015; 12: e1001885.

**The RECORD statement – checklist of items, extended from the STROBE statement, that should be reported in observational studies using routinely collected health data.**

|                           | Item No. | STROBE items                                                                                                                                                                               | Location in manuscript where items are reported | RECORD items                                                                                                                                                                                                                                                                                                                                                                                                                                | Location in manuscript where items are reported |
|---------------------------|----------|--------------------------------------------------------------------------------------------------------------------------------------------------------------------------------------------|-------------------------------------------------|---------------------------------------------------------------------------------------------------------------------------------------------------------------------------------------------------------------------------------------------------------------------------------------------------------------------------------------------------------------------------------------------------------------------------------------------|-------------------------------------------------|
| <b>Title and abstract</b> |          |                                                                                                                                                                                            |                                                 |                                                                                                                                                                                                                                                                                                                                                                                                                                             |                                                 |
|                           | 1        | (a) Indicate the study's design with a commonly used term in the title or the abstract (b) Provide in the abstract an informative and balanced summary of what was done and what was found |                                                 | RECORD 1.1: The type of data used should be specified in the title or abstract. When possible, the name of the databases used should be included.<br><br>RECORD 1.2: If applicable, the geographic region and timeframe within which the study took place should be reported in the title or abstract.<br><br>RECORD 1.3: If linkage between databases was conducted for the study, this should be clearly stated in the title or abstract. | Pages 1-2                                       |
| <b>Introduction</b>       |          |                                                                                                                                                                                            |                                                 |                                                                                                                                                                                                                                                                                                                                                                                                                                             |                                                 |
| Background rationale      | 2        | Explain the scientific background and rationale for the investigation being reported                                                                                                       |                                                 |                                                                                                                                                                                                                                                                                                                                                                                                                                             | Page 3                                          |
| Objectives                | 3        | State specific objectives, including any prespecified hypotheses                                                                                                                           |                                                 |                                                                                                                                                                                                                                                                                                                                                                                                                                             | Page 3                                          |
| <b>Methods</b>            |          |                                                                                                                                                                                            |                                                 |                                                                                                                                                                                                                                                                                                                                                                                                                                             |                                                 |
| Study Design              | 4        | Present key elements of study design early in the paper                                                                                                                                    |                                                 |                                                                                                                                                                                                                                                                                                                                                                                                                                             | Page 4                                          |
| Setting                   | 5        | Describe the setting, locations, and relevant dates, including periods of recruitment, exposure, follow-up, and data collection                                                            |                                                 |                                                                                                                                                                                                                                                                                                                                                                                                                                             | Page 4                                          |
| Participants              | 6        | (a) <i>Cohort study</i> - Give the eligibility criteria, and the                                                                                                                           |                                                 | RECORD 6.1: The methods of study population selection (such as codes or                                                                                                                                                                                                                                                                                                                                                                     | Page 4                                          |

|                                                                                                                                           |                              |                                                                                                                                                                                                                                                                                                                                                                                                                                                                                                                                                                                                                                                             |                                                                                                                                                                                      |                                                                                                                                                                                                                                                                                                                                                                                                                                                                                                                                                                                                                              |           |
|-------------------------------------------------------------------------------------------------------------------------------------------|------------------------------|-------------------------------------------------------------------------------------------------------------------------------------------------------------------------------------------------------------------------------------------------------------------------------------------------------------------------------------------------------------------------------------------------------------------------------------------------------------------------------------------------------------------------------------------------------------------------------------------------------------------------------------------------------------|--------------------------------------------------------------------------------------------------------------------------------------------------------------------------------------|------------------------------------------------------------------------------------------------------------------------------------------------------------------------------------------------------------------------------------------------------------------------------------------------------------------------------------------------------------------------------------------------------------------------------------------------------------------------------------------------------------------------------------------------------------------------------------------------------------------------------|-----------|
| 1<br>2<br>3<br>4<br>5<br>6<br>7<br>8<br>9<br>10<br>11<br>12<br>13<br>14<br>15<br>16<br>17<br>18<br>19<br>20<br>21<br>22<br>23<br>24<br>25 |                              | <p>sources and methods of selection of participants. Describe methods of follow-up</p> <p><i>Case-control study</i> - Give the eligibility criteria, and the sources and methods of case ascertainment and control selection. Give the rationale for the choice of cases and controls</p> <p><i>Cross-sectional study</i> - Give the eligibility criteria, and the sources and methods of selection of participants</p> <p>(b) <i>Cohort study</i> - For matched studies, give matching criteria and number of exposed and unexposed</p> <p><i>Case-control study</i> - For matched studies, give matching criteria and the number of controls per case</p> |                                                                                                                                                                                      | <p>algorithms used to identify subjects) should be listed in detail. If this is not possible, an explanation should be provided.</p> <p>RECORD 6.2: Any validation studies of the codes or algorithms used to select the population should be referenced. If validation was conducted for this study and not published elsewhere, detailed methods and results should be provided.</p> <p>RECORD 6.3: If the study involved linkage of databases, consider use of a flow diagram or other graphical display to demonstrate the data linkage process, including the number of individuals with linked data at each stage.</p> |           |
| 26<br>27<br>28<br>29<br>30<br>31<br>32                                                                                                    | Variables                    | 7                                                                                                                                                                                                                                                                                                                                                                                                                                                                                                                                                                                                                                                           | Clearly define all outcomes, exposures, predictors, potential confounders, and effect modifiers. Give diagnostic criteria, if applicable.                                            | RECORD 7.1: A complete list of codes and algorithms used to classify exposures, outcomes, confounders, and effect modifiers should be provided. If these cannot be reported, an explanation should be provided.                                                                                                                                                                                                                                                                                                                                                                                                              | Pages 4-5 |
| 33<br>34<br>35<br>36<br>37<br>38<br>39<br>40                                                                                              | Data sources/<br>measurement | 8                                                                                                                                                                                                                                                                                                                                                                                                                                                                                                                                                                                                                                                           | For each variable of interest, give sources of data and details of methods of assessment (measurement). Describe comparability of assessment methods if there is more than one group |                                                                                                                                                                                                                                                                                                                                                                                                                                                                                                                                                                                                                              | Page 4    |
| 41<br>42                                                                                                                                  | Bias                         | 9                                                                                                                                                                                                                                                                                                                                                                                                                                                                                                                                                                                                                                                           | Describe any efforts to address potential sources of bias                                                                                                                            |                                                                                                                                                                                                                                                                                                                                                                                                                                                                                                                                                                                                                              | Pages 4-5 |
| 43<br>44<br>45<br>46<br>47                                                                                                                | Study size                   | 10                                                                                                                                                                                                                                                                                                                                                                                                                                                                                                                                                                                                                                                          | Explain how the study size was                                                                                                                                                       |                                                                                                                                                                                                                                                                                                                                                                                                                                                                                                                                                                                                                              | Page 6    |

|                                                                                                                                           |                                  |            |                                                                                                                                                                                                                                                                                                                                                                                                                                                                                                                                                                      |                                                                                                                                                                                                                                                              |
|-------------------------------------------------------------------------------------------------------------------------------------------|----------------------------------|------------|----------------------------------------------------------------------------------------------------------------------------------------------------------------------------------------------------------------------------------------------------------------------------------------------------------------------------------------------------------------------------------------------------------------------------------------------------------------------------------------------------------------------------------------------------------------------|--------------------------------------------------------------------------------------------------------------------------------------------------------------------------------------------------------------------------------------------------------------|
|                                                                                                                                           |                                  | arrived at |                                                                                                                                                                                                                                                                                                                                                                                                                                                                                                                                                                      |                                                                                                                                                                                                                                                              |
| 1<br>2<br>3<br>4<br>5<br>6                                                                                                                | Quantitative variables           | 11         | Explain how quantitative variables were handled in the analyses. If applicable, describe which groupings were chosen, and why                                                                                                                                                                                                                                                                                                                                                                                                                                        | Page 4-5                                                                                                                                                                                                                                                     |
| 7<br>8<br>9<br>10<br>11<br>12<br>13<br>14<br>15<br>16<br>17<br>18<br>19<br>20<br>21<br>22<br>23<br>24<br>25<br>26<br>27<br>28<br>29<br>30 | Statistical methods              | 12         | (a) Describe all statistical methods, including those used to control for confounding<br>(b) Describe any methods used to examine subgroups and interactions<br>(c) Explain how missing data were addressed<br>(d) <i>Cohort study</i> - If applicable, explain how loss to follow-up was addressed<br><i>Case-control study</i> - If applicable, explain how matching of cases and controls was addressed<br><i>Cross-sectional study</i> - If applicable, describe analytical methods taking account of sampling strategy<br>(e) Describe any sensitivity analyses | Page 5                                                                                                                                                                                                                                                       |
| 31<br>32<br>33<br>34<br>35<br>36<br>37<br>38<br>39<br>40<br>41                                                                            | Data access and cleaning methods |            | ..                                                                                                                                                                                                                                                                                                                                                                                                                                                                                                                                                                   | RECORD 12.1: Authors should describe the extent to which the investigators had access to the database population used to create the study population.<br><br>RECORD 12.2: Authors should provide information on the data cleaning methods used in the study. |
| 42<br>43<br>44                                                                                                                            | Linkage                          |            | ..                                                                                                                                                                                                                                                                                                                                                                                                                                                                                                                                                                   | RECORD 12.3: State whether the study included person-level, institutional-                                                                                                                                                                                   |

|                  |    |                                                                                                                                                                                                                                                                                                                                                 |  |                                                                                                                                                                                                                                                                                                                    |     |
|------------------|----|-------------------------------------------------------------------------------------------------------------------------------------------------------------------------------------------------------------------------------------------------------------------------------------------------------------------------------------------------|--|--------------------------------------------------------------------------------------------------------------------------------------------------------------------------------------------------------------------------------------------------------------------------------------------------------------------|-----|
|                  |    |                                                                                                                                                                                                                                                                                                                                                 |  | level, or other data linkage across two or more databases. The methods of linkage and methods of linkage quality evaluation should be provided.                                                                                                                                                                    |     |
| <b>Results</b>   |    |                                                                                                                                                                                                                                                                                                                                                 |  |                                                                                                                                                                                                                                                                                                                    |     |
| Participants     | 13 | (a) Report the numbers of individuals at each stage of the study ( <i>e.g.</i> , numbers potentially eligible, examined for eligibility, confirmed eligible, included in the study, completing follow-up, and analysed)<br>(b) Give reasons for non-participation at each stage.<br>(c) Consider use of a flow diagram                          |  | RECORD 13.1: Describe in detail the selection of the persons included in the study ( <i>i.e.</i> , study population selection) including filtering based on data quality, data availability and linkage. The selection of included persons can be described in the text and/or by means of the study flow diagram. | N/A |
| Descriptive data | 14 | (a) Give characteristics of study participants ( <i>e.g.</i> , demographic, clinical, social) and information on exposures and potential confounders<br>(b) Indicate the number of participants with missing data for each variable of interest<br>(c) <i>Cohort study</i> - summarise follow-up time ( <i>e.g.</i> , average and total amount) |  |                                                                                                                                                                                                                                                                                                                    | N/A |
| Outcome data     | 15 | <i>Cohort study</i> - Report numbers of outcome events or summary measures over time<br><i>Case-control study</i> - Report numbers in each exposure category, or summary measures of exposure<br><i>Cross-sectional study</i> - Report numbers of outcome events or summary measures                                                            |  |                                                                                                                                                                                                                                                                                                                    | N/A |
| Main results     | 16 | (a) Give unadjusted estimates                                                                                                                                                                                                                                                                                                                   |  |                                                                                                                                                                                                                                                                                                                    | N/A |

|    |                   |                                                                                                                         |                                   |                                           |     |
|----|-------------------|-------------------------------------------------------------------------------------------------------------------------|-----------------------------------|-------------------------------------------|-----|
| 1  |                   | and, if applicable, confounder-adjusted estimates and their precision (e.g., 95% confidence interval). Make clear which |                                   |                                           |     |
| 2  |                   | confounders were adjusted for                                                                                           |                                   |                                           |     |
| 3  |                   | and why they were included                                                                                              |                                   |                                           |     |
| 4  |                   | (b) Report category boundaries                                                                                          |                                   |                                           |     |
| 5  |                   | when continuous variables were                                                                                          |                                   |                                           |     |
| 6  |                   | categorized                                                                                                             |                                   |                                           |     |
| 7  |                   | (c) If relevant, consider                                                                                               |                                   |                                           |     |
| 8  |                   | translating estimates of relative                                                                                       |                                   |                                           |     |
| 9  |                   | risk into absolute risk for a                                                                                           |                                   |                                           |     |
| 10 |                   | meaningful time period                                                                                                  |                                   |                                           |     |
| 11 |                   |                                                                                                                         |                                   |                                           |     |
| 12 |                   |                                                                                                                         |                                   |                                           |     |
| 13 |                   |                                                                                                                         |                                   |                                           |     |
| 14 |                   |                                                                                                                         |                                   |                                           |     |
| 15 | Other analyses    | 17                                                                                                                      | Report other analyses done—e.g.,  |                                           | N/A |
| 16 |                   |                                                                                                                         | analyses of subgroups and         |                                           |     |
| 17 |                   |                                                                                                                         | interactions, and sensitivity     |                                           |     |
| 18 |                   |                                                                                                                         | analyses                          |                                           |     |
| 19 |                   |                                                                                                                         |                                   |                                           |     |
| 20 | <b>Discussion</b> |                                                                                                                         |                                   |                                           |     |
| 21 | Key results       | 18                                                                                                                      | Summarise key results with        |                                           | N/A |
| 22 |                   |                                                                                                                         | reference to study objectives     |                                           |     |
| 23 | Limitations       | 19                                                                                                                      | Discuss limitations of the study, | RECORD 19.1: Discuss the                  | N/A |
| 24 |                   |                                                                                                                         | taking into account sources of    | implications of using data that were not  |     |
| 25 |                   |                                                                                                                         | potential bias or imprecision.    | created or collected to answer the        |     |
| 26 |                   |                                                                                                                         | Discuss both direction and        | specific research question(s). Include    |     |
| 27 |                   |                                                                                                                         | magnitude of any potential bias   | discussion of misclassification bias,     |     |
| 28 |                   |                                                                                                                         |                                   | unmeasured confounding, missing data,     |     |
| 29 |                   |                                                                                                                         |                                   | and changing eligibility over time, as    |     |
| 30 |                   |                                                                                                                         |                                   | they pertain to the study being reported. |     |
| 31 |                   |                                                                                                                         |                                   |                                           |     |
| 32 | Interpretation    | 20                                                                                                                      | Give a cautious overall           |                                           | N/A |
| 33 |                   |                                                                                                                         | interpretation of results         |                                           |     |
| 34 |                   |                                                                                                                         | considering objectives,           |                                           |     |
| 35 |                   |                                                                                                                         | limitations, multiplicity of      |                                           |     |
| 36 |                   |                                                                                                                         | analyses, results from similar    |                                           |     |
| 37 |                   |                                                                                                                         | studies, and other relevant       |                                           |     |
| 38 |                   |                                                                                                                         | evidence                          |                                           |     |
| 39 |                   |                                                                                                                         |                                   |                                           |     |
| 40 | Generalisability  | 21                                                                                                                      | Discuss the generalisability      |                                           | N/A |
| 41 |                   |                                                                                                                         | (external validity) of the study  |                                           |     |
| 42 |                   |                                                                                                                         | results                           |                                           |     |
| 43 |                   |                                                                                                                         |                                   |                                           |     |
| 44 |                   |                                                                                                                         |                                   |                                           |     |

| Other Information                                         |    |                                                                                                                                                               |  |                                                                                                                                                          |        |
|-----------------------------------------------------------|----|---------------------------------------------------------------------------------------------------------------------------------------------------------------|--|----------------------------------------------------------------------------------------------------------------------------------------------------------|--------|
| Funding                                                   | 22 | Give the source of funding and the role of the funders for the present study and, if applicable, for the original study on which the present article is based |  |                                                                                                                                                          | Page 6 |
| Accessibility of protocol, raw data, and programming code |    | ..                                                                                                                                                            |  | RECORD 22.1: Authors should provide information on how to access any supplemental information such as the study protocol, raw data, or programming code. | N/A    |

\*Reference: Benchimol EI, Smeeth L, Guttman A, Harron K, Moher D, Petersen I, Sørensen HT, von Elm E, Langan SM, the RECORD Working Committee. The REporting of studies Conducted using Observational Routinely-collected health Data (RECORD) Statement. *PLoS Medicine* 2015; in press.

\*Checklist is protected under Creative Commons Attribution ([CC BY](https://creativecommons.org/licenses/by/4.0/)) license.
